# Supplementary material
Source: publisher figshare collection journal article supplement (https://karger.figshare.com/articles/dataset/_/5129119)
Supplement: Supplementary file 1 [file 1]

PID ##PMID##

|                  |         |
|------------------|---------|
| Pubmed ID        | N/A     |
| Title            | N/A     |
| Authors          |         |
| Journal          | . . . . |
| Publication Year | N/A     |
| Source file      |         |

Go without saving to : [\\* all MY assigned articles](#)  
[\\* MY not yet reviewed articles](#)  
[\\* MY already reviewed articles](#)

 [Help](#)

Please click on the table header to move into the next section

| B<br>Manuscript     | C<br>Study aim      | D<br>Study design   | E<br>Setting and time | F<br>Methods        | G<br>Socio-demography | H<br>Phenotypes     | I<br>Summary        |
|---------------------|---------------------|---------------------|-----------------------|---------------------|-----------------------|---------------------|---------------------|
| in work<br>complete | in work<br>complete | in work<br>complete | in work<br>complete   | in work<br>complete | in work<br>complete   | in work<br>complete | in work<br>complete |

#### B Manuscript classification according to systematic review aims

1. Do you agree with previous reviewers that this study is relevant to identify a clinically expressed, population-based phenotype/s of IgE - associated diseases or conditions including asthma/wheezing, atopic eczema, rhinoconjunctivitis, food allergy, urticaria and anaphylaxis, as well as their interrelationships, from childhood to young adulthood ?

☐ yes ☐ no

2. Do you think this study does fulfill the protocol inclusion criteria ?

☐ yes ☐ no [show inclusion criteria](#)

3. Do you think this study fulfills one or more protocol exclusion criteria ?

☐ yes ☐ no [show exclusion criteria](#)

3.1 Which criteria is not fulfilled ?

4. According to the study aims and focus, indicate in which of the following categories you would include this study ?

- ☐ The study explores heterogeneity within phenotypes
- ☐ The study explore overlap between phenotypes
- ☐ The study appraised or validated methods (test or biological measurements) to better define or classify phenotypes
- ☐ None of the previous categories

### C - Study aim/s and hypothesis

#### Study hypothesis

##### 1. Was the study hypothesis clearly described in the text ?

☐ yes

☐ no

#### Study aim/s

##### 2. Please copy the full aim/s text and paste into the box below

### D - Disease/s or condition/s included and study design

##### 1. Which IgE associated diseases or conditions are included in this study (MR) ?

☐ Asthma and/or wheeze

☐ Food Allergy

☐ Rhinitis

☐ Urticaria

☐ Eczema / Atopic dermatitis

☐ Anaphylaxis

##### 2. Considering the aim/s of the study, in which of the following categories you would include it (MR) ?

☐ Description of phenotypes (\*)

☐ Treatment response (\*)

☐ Validation of phenotypes (\*)

☐ Others

☐ Prognosis (\*)

(\*) see tooltips

##### 3. Which of the following categories of study designs should this study be included ?

☐ Case series

☐ Cohort

☐ Cross-sectional

☐ Clinical trial

☐ Case-control

**Cohort study :** please answer questions from 4.1 to 4.3

**4.1 Which was the type of follow-up ?**☐ Prospective☐ Retrospective**4.2 Could you indicate the age at the starting and end of individual's follow-up ?**

Age ... at starting point at end point

... if in  years  years

years

... if in  months  months

months

**4.3 How many times was information collected over the period of follow-up including baseline and end point ?**☐ Never/unknown☐ 1 x☐ 2 x☐ 3 x☐ 4 x☐ 5 x☐ 6 x☐ 7 x☐ 8 x☐ 9 x☐ >= 10 x**Clinical trial** : please answer questions from 5.1 to 5.10**5.1 If the study design was a clinical trial, mark the items that best describe its characteristics (MR) ?**☐ Randomized☐ Double blind☐ Population-based☐ Community Intervention☐ Comparison group☐ Multicenter**"Intervention"** selected : please answer also questions 5.2 to 5.3**5.2 Was the intervention clearly defined ?**☐ yes☐ no**5.3 Could you briefly describe the intervention ?****5.4 Were the inclusion/exclusion criteria clearly specified ?**☐ yes☐ no**5.5 How many groups were compared ?** groups**5.6 Overall, how long was the period of follow-up ?**years :  OR months : **5.7 How many times was information collected over the period of follow-up including baseline and end point ?**☐ Never/unknown☐ 1 x☐ 2 x☐ 3 x☐ 4 x☐ 5 x☐ 6 x☐ 7 x☐ 8 x☐ 9 x☐ 10 x

**5.8 Was intention to treat analysis described in the methods section ?**☐ yes☐ no**5.9 Was intention to treat analysis really carried out ?**☐ yes☐ no**5.10 Did the authors of the manuscript mention that the study design complied with the CONSORT statement ?**☐ yes☐ no[see CONSORT statement](#)**E - Study setting and time****1. How would you describe the study population ?**☐ Population based☐ Clinical population**1.1 Could you indicate which was the setting from which the individuals were recruited (MR) ?**☐ Hospital☐ Outpatients clinic☐ Disease registry☐ Primary care☐ Others**2 Was the study conducted only in one country or at international level ?**☐ One country☐ International level**2.1 In which country was the study conducted ?****3. Was the study period available ?**☐ yes☐ no**3.1 Period of recruitment ?**Starting year : Finishing year : **4. Which was the total number of individuals included into the study ?**Number of individuals : **5. Which was the participation rate ?**Rate (in %) : **6. If the participation rate was not 100%, were differences between included and excluded individuals assessed ?**☐ yes☐ no

**F - Methods used for individuals assessment****Questionnaires****1. Were questionnaires used for the individuals assessment ?**

☐ yes ☐ no

**1.1 Was a reference given for the questionnaire ?**

☐ yes ☐ no

**1.2 Which was the reference number ?**

Reference number :

**1.3 How was the questionnaire administered (MR) ?**

☐ Self-administered ☐ Telephone ☐ Personal interview ☐ Clinical examination

**Biological measurements****2.1 Was total IgE measured?**

☐ yes ☐ no

**2.2 Were specific IgEs measured ?**

☐ yes ☐ no

**2.3 Which type of allergens were tested ?**

|                                  |                                        |                      |
|----------------------------------|----------------------------------------|----------------------|
| <input type="checkbox"/> Food    | 2.3.1 How many allergens were tested ? | <input type="text"/> |
| <input type="checkbox"/> Indoor  | 2.3.2 How many allergens were tested ? | <input type="text"/> |
| <input type="checkbox"/> Outdoor | 2.3.3 How many allergens were tested ? | <input type="text"/> |

**2.4 Was the skin prick test used ?**

☐ yes ☐ no

**2.5 Which type of allergens were tested ?**

|                                  |                                        |                      |
|----------------------------------|----------------------------------------|----------------------|
| <input type="checkbox"/> Food    | 2.5.1 How many allergens were tested ? | <input type="text"/> |
| <input type="checkbox"/> Indoor  | 2.5.2 How many allergens were tested ? | <input type="text"/> |
| <input type="checkbox"/> Outdoor | 2.5.3 How many allergens were tested ? | <input type="text"/> |

**2.6 Was the patch test used ?**

☐ yes ☐ no

**2.6.1 How many allergens were tested ?**

Number of allergens :

**2.7 Was spirometry test used to measure lung function ?**☐ yes☐ no**2.7.1 Was a post-bronchodilator test performed ?**☐ yes☐ no**2.8. Was peak flow test used to measure lung function ?**☐ yes☐ no**2.9. Was a BHR test performed ?**☐ yes☐ no**2.9.1 Which was the method used ?**☐ Methacoline☐ Hypertonic Saline☐ Exercise☐ Histamine☐ EVH (Eucapnic voluntary hyperpnoea)**2.10 Were other biomarkers measured ?**☐ yes☐ no**2.10.1 Which biomarkers were measured ?**

1)

2)

3)

4)

5)

**2.10.2 In which of the following media were they measured ?**☐ Serum☐ Plasma☐ Bronchoalveolar lavage☐ Sputum☐ Breath condensate☐ Urine**2.11 Which other tests / measurements / examinations were performed ?**

(please enter 'none' if not other were performed !)

1)

2)

3)

4)

5)

**Severity assessment****3.1 Was phenotype/s severity assessed ?**☐ yes☐ no**3.1.1 Could you briefly describe which guidelines criteria or methods were used to assess severity ?**

|                                                                                                                                                                                                                |  |
|----------------------------------------------------------------------------------------------------------------------------------------------------------------------------------------------------------------|--|
|                                                                                                                                                                                                                |  |
|                                                                                                                                                                                                                |  |
| <b>G Socio-demographic characteristics and family history</b>                                                                                                                                                  |  |
|                                                                                                                                                                                                                |  |
| <b>Socio-demographic characteristics</b>                                                                                                                                                                       |  |
|                                                                                                                                                                                                                |  |
| <b>1.1 Which is the individuals age range for the overall population ?</b>                                                                                                                                     |  |
| in Months : <input style="width: 50px;" type="text"/> to <input style="width: 50px;" type="text"/> <b>OR</b> in Years : <input style="width: 50px;" type="text"/> to <input style="width: 50px;" type="text"/> |  |
| In the case of <b>cohort studies</b> or <b>clinical trials</b> with a period of follow-up the age range at baseline should be indicated (see D4.4 / D5.6)                                                      |  |
|                                                                                                                                                                                                                |  |
| <b>1.2 Which was the sex distribution ?</b>                                                                                                                                                                    |  |
| Males (in %) : <input style="width: 50px;" type="text"/>                                                                                                                                                       |  |
| Females (in %) : <input style="width: 50px;" type="text"/>                                                                                                                                                     |  |
|                                                                                                                                                                                                                |  |
| <b>1.3 Was ethnicity/ race collected ?</b>                                                                                                                                                                     |  |
| <input type="radio"/> yes <span style="margin-left: 200px;"><input type="radio"/> no</span>                                                                                                                    |  |
|                                                                                                                                                                                                                |  |
| <b>1.4 Was parent education collected ?</b>                                                                                                                                                                    |  |
| <input type="radio"/> yes <span style="margin-left: 200px;"><input type="radio"/> no</span>                                                                                                                    |  |
|                                                                                                                                                                                                                |  |
| <b>1.5 Were any of the socio-economic indicators collected ?</b>                                                                                                                                               |  |
| <input type="radio"/> yes <span style="margin-left: 200px;"><input type="radio"/> no</span>                                                                                                                    |  |
|                                                                                                                                                                                                                |  |
| <b>Family history</b>                                                                                                                                                                                          |  |
|                                                                                                                                                                                                                |  |
| <b>Mother</b>                                                                                                                                                                                                  |  |
|                                                                                                                                                                                                                |  |
| <b>2.1 Was mother's allergic disease/s history collected ?</b>                                                                                                                                                 |  |
| <input type="radio"/> yes <span style="margin-left: 200px;"><input type="radio"/> no</span>                                                                                                                    |  |
|                                                                                                                                                                                                                |  |
| <b>2.1.1. Which condition/s ?</b>                                                                                                                                                                              |  |
| 1) <input style="width: 700px;" type="text"/>                                                                                                                                                                  |  |
| 2) <input style="width: 700px;" type="text"/>                                                                                                                                                                  |  |
| 3) <input style="width: 700px;" type="text"/>                                                                                                                                                                  |  |
| 4) <input style="width: 700px;" type="text"/>                                                                                                                                                                  |  |

**2.1.2. How was/were this/these condition/s assessed (MR) ?**

☐ Questionnaire ☐ IgE / Blood ☐ Skin Prick Test ☐ Not clear

**Father****2.2 Was fathers's allergic disease/s history collected ?**

☐ yes ☐ no

**2.2.1. Which condition/s ?**

- 1)
- 2)
- 3)
- 4)

**2.2.2. How was/were this/these condition/s assessed (MR) ?**

☐ Questionnaire ☐ IgE / Blood ☐ Skin Prick Test ☐ Not clear

**H Phenotypes name**

| Phenotype                | Was the phenotype definition provided ? |                          |
|--------------------------|-----------------------------------------|--------------------------|
| 1. <input type="text"/>  | <input type="radio"/> yes               | <input type="radio"/> no |
| 2. <input type="text"/>  | <input type="radio"/> yes               | <input type="radio"/> no |
| 3. <input type="text"/>  | <input type="radio"/> yes               | <input type="radio"/> no |
| 4. <input type="text"/>  | <input type="radio"/> yes               | <input type="radio"/> no |
| 5. <input type="text"/>  | <input type="radio"/> yes               | <input type="radio"/> no |
| 6. <input type="text"/>  | <input type="radio"/> yes               | <input type="radio"/> no |
| 7. <input type="text"/>  | <input type="radio"/> yes               | <input type="radio"/> no |
| 8. <input type="text"/>  | <input type="radio"/> yes               | <input type="radio"/> no |
| 9. <input type="text"/>  | <input type="radio"/> yes               | <input type="radio"/> no |
| 10. <input type="text"/> | <input type="radio"/> yes               | <input type="radio"/> no |

**I - Summary of study conclusions**



|                                                                                                                                                                                                                                                                                                                                                                                                                                                                                                                                                                                                                                                                                                                                                                                                                                                                                                                                                          |  |  |  |  |  |  |  |  |  |  |  |  |  |  |  |  |  |  |  |  |  |  |  |  |
|----------------------------------------------------------------------------------------------------------------------------------------------------------------------------------------------------------------------------------------------------------------------------------------------------------------------------------------------------------------------------------------------------------------------------------------------------------------------------------------------------------------------------------------------------------------------------------------------------------------------------------------------------------------------------------------------------------------------------------------------------------------------------------------------------------------------------------------------------------------------------------------------------------------------------------------------------------|--|--|--|--|--|--|--|--|--|--|--|--|--|--|--|--|--|--|--|--|--|--|--|--|
|                                                                                                                                                                                                                                                                                                                                                                                                                                                                                                                                                                                                                                                                                                                                                                                                                                                                                                                                                          |  |  |  |  |  |  |  |  |  |  |  |  |  |  |  |  |  |  |  |  |  |  |  |  |
| <b>1. Please summarize the study main conclusions as described in the manuscript</b>                                                                                                                                                                                                                                                                                                                                                                                                                                                                                                                                                                                                                                                                                                                                                                                                                                                                     |  |  |  |  |  |  |  |  |  |  |  |  |  |  |  |  |  |  |  |  |  |  |  |  |
|                                                                                                                                                                                                                                                                                                                                                                                                                                                                                                                                                                                                                                                                                                                                                                                                                                                                                                                                                          |  |  |  |  |  |  |  |  |  |  |  |  |  |  |  |  |  |  |  |  |  |  |  |  |
| <b>2. Taking into account the study relevance for phenotypes identification and the protocol inclusion/exclusion criteria, what do you think we should do with this study ?</b>                                                                                                                                                                                                                                                                                                                                                                                                                                                                                                                                                                                                                                                                                                                                                                          |  |  |  |  |  |  |  |  |  |  |  |  |  |  |  |  |  |  |  |  |  |  |  |  |
| <input type="radio"/> Include it <input type="radio"/> Should be reviewed by another expert <input type="radio"/> Exclude it                                                                                                                                                                                                                                                                                                                                                                                                                                                                                                                                                                                                                                                                                                                                                                                                                             |  |  |  |  |  |  |  |  |  |  |  |  |  |  |  |  |  |  |  |  |  |  |  |  |
| If you would <b>exclude</b> it, please provide an explanation in the comments below (L-4)                                                                                                                                                                                                                                                                                                                                                                                                                                                                                                                                                                                                                                                                                                                                                                                                                                                                |  |  |  |  |  |  |  |  |  |  |  |  |  |  |  |  |  |  |  |  |  |  |  |  |
| <b>3. Does this study provide references of other studies that could be included for data extraction ?</b>                                                                                                                                                                                                                                                                                                                                                                                                                                                                                                                                                                                                                                                                                                                                                                                                                                               |  |  |  |  |  |  |  |  |  |  |  |  |  |  |  |  |  |  |  |  |  |  |  |  |
| <input type="radio"/> yes <input type="radio"/> no                                                                                                                                                                                                                                                                                                                                                                                                                                                                                                                                                                                                                                                                                                                                                                                                                                                                                                       |  |  |  |  |  |  |  |  |  |  |  |  |  |  |  |  |  |  |  |  |  |  |  |  |
| <b>3.1 Please, provide the reference number/s for this/these study/ies:</b>                                                                                                                                                                                                                                                                                                                                                                                                                                                                                                                                                                                                                                                                                                                                                                                                                                                                              |  |  |  |  |  |  |  |  |  |  |  |  |  |  |  |  |  |  |  |  |  |  |  |  |
| Please either the <b>reference number</b> or the <b>name of first author</b> and <b>year</b> if the number is not available                                                                                                                                                                                                                                                                                                                                                                                                                                                                                                                                                                                                                                                                                                                                                                                                                              |  |  |  |  |  |  |  |  |  |  |  |  |  |  |  |  |  |  |  |  |  |  |  |  |
| <table border="1" style="width: 100%; border-collapse: collapse;"><tr><td style="width: 25%; height: 20px;"></td><td style="width: 25%; height: 20px;"></td><td style="width: 25%; height: 20px;"></td><td style="width: 25%; height: 20px;"></td></tr><tr><td style="height: 20px;"></td><td style="height: 20px;"></td><td style="height: 20px;"></td><td style="height: 20px;"></td></tr></table> |  |  |  |  |  |  |  |  |  |  |  |  |  |  |  |  |  |  |  |  |  |  |  |  |
|                                                                                                                                                                                                                                                                                                                                                                                                                                                                                                                                                                                                                                                                                                                                                                                                                                                                                                                                                          |  |  |  |  |  |  |  |  |  |  |  |  |  |  |  |  |  |  |  |  |  |  |  |  |
|                                                                                                                                                                                                                                                                                                                                                                                                                                                                                                                                                                                                                                                                                                                                                                                                                                                                                                                                                          |  |  |  |  |  |  |  |  |  |  |  |  |  |  |  |  |  |  |  |  |  |  |  |  |
|                                                                                                                                                                                                                                                                                                                                                                                                                                                                                                                                                                                                                                                                                                                                                                                                                                                                                                                                                          |  |  |  |  |  |  |  |  |  |  |  |  |  |  |  |  |  |  |  |  |  |  |  |  |
|                                                                                                                                                                                                                                                                                                                                                                                                                                                                                                                                                                                                                                                                                                                                                                                                                                                                                                                                                          |  |  |  |  |  |  |  |  |  |  |  |  |  |  |  |  |  |  |  |  |  |  |  |  |
|                                                                                                                                                                                                                                                                                                                                                                                                                                                                                                                                                                                                                                                                                                                                                                                                                                                                                                                                                          |  |  |  |  |  |  |  |  |  |  |  |  |  |  |  |  |  |  |  |  |  |  |  |  |
|                                                                                                                                                                                                                                                                                                                                                                                                                                                                                                                                                                                                                                                                                                                                                                                                                                                                                                                                                          |  |  |  |  |  |  |  |  |  |  |  |  |  |  |  |  |  |  |  |  |  |  |  |  |
| <b>4. Please include any additional comments which might be relevant for the review</b>                                                                                                                                                                                                                                                                                                                                                                                                                                                                                                                                                                                                                                                                                                                                                                                                                                                                  |  |  |  |  |  |  |  |  |  |  |  |  |  |  |  |  |  |  |  |  |  |  |  |  |
|                                                                                                                                                                                                                                                                                                                                                                                                                                                                                                                                                                                                                                                                                                                                                                                                                                                                                                                                                          |  |  |  |  |  |  |  |  |  |  |  |  |  |  |  |  |  |  |  |  |  |  |  |  |
