# Supplementary material
Source: publisher figshare collection journal article supplement (https://karger.figshare.com/articles/dataset/_/5129119)
Supplement: Supplementary file 2 [file 1 › 000442414_sm_Suppl._Material.docx]

Supporting information

**Systematic review on the definition of allergic diseases in children: The MeDALL study**

Mariona Pinart, Richard Albang, Dieter Maier,Enric Duran-Tauleria, Guillermo Mena,Elena Gimeno-Santos, Ivan Solà, Judith Garcia-Aymerich, Stefano Guerra, Renato T. Stein, Marta Benet, Kai-Hakon Carlsen**,** Marie Herr, Bénédicte Jacquemin, Isabelle Momas, Isabelle Pin, Fanny Rancière, Henriette A. Smit, Raphaelle Varraso, Xavier Bonfill, Jean Bousquet, Josep M. Anto

**Table of contents**

[Table S1. Objectives of the systematic review 3](#_Toc420484594)

[Table S2. Characteristics of the included studies 4](#_Toc420484595)

[Fig S2. Distribution of the studies per country and year of publication 13](#_Toc420484596)

[Table S3. Methodology used in the included studies for each allergic disease 14](#_Toc420484597)

[Table S4. Published classifications of asthma/wheeze in children 17](#_Toc420484598)

[Table S5. Published classifications of eczema/atopic dermatitis in children 30](#_Toc420484599)

[Table S6. Published classifications of rhinitis/allergic rhinitis in children 35](#_Toc420484600)

[Table S7. Published classifications of food allergy in children 39](#_Toc420484601)

[Table S8. Published classifications of urticaria in children 47](#_Toc420484602)

[Table S9. Terms used to examine phenotypes in studies assessing single allergic diseases 49](#_Toc420484603)

[Table S10. Terms used to examine phenotypes in studies assessing comorbidity 55](#_Toc420484604)

[Table S11. Related terms used in already defined phenotypes 64](#_Toc420484605)

[Discussion 65](#_Toc420484606)

[References 67](#_Toc420484607)

# Table S1. Objectives of the systematic review

| Primary objective | To identify clinically expressed, population-based, phenotypes of IgE-associated diseases or conditions including asthma/wheezing, atopic eczema, rhinoconjuctivitis, food allergy, urticaria and anaphylaxis, as well as their interrelationships, from childhood to young adulthood. |
| --- | --- |
| Secondary objective (1) | To explore heterogeneity within phenotypes.  By heterogeneitywemean that subjects classified into a specific phenotype (such as asthma) can show intra-phenotype differences that can be better organised by re-classification of the phenotype in two or more groups (Transient or Persistent wheezers). |
| Secondary objective (2) | To appraise the varied approaches to measure phenotypes.  Approaches refer both to study design and type of measures where several data can be used: IgE levels (chord blood and follow-up serum), skin allergy testing such as SPT, pulmonary-function testing, co-morbidities, questionnaires etc. Depending on the data used, distinct phenotypes can be defined. For example, some studies assess the presence of a new phenotype in longitudinal studies looking at the course of the disease whereas other studies look at cross-sectional associations with disease markers. |

# Table S2. Characteristics of the included studies

| **Study ref.** | **Country** | **year** | **Nº citup to 2012** | **Nº citin 2013** | **Study design** | **Recruit period** | **Study pop** | **Sample size** | **Disease conditions** | **Disease conditions in title** |
| --- | --- | --- | --- | --- | --- | --- | --- | --- | --- | --- |
| **Hall et al**[1] | Australia | 1972 | 0 | 0 | CS | 1968 | P | 8410 | NS | A;R;E |
| **Mcnicol et al**[2] | Australia | 1973 | 243 | 0 | Cohort | 1965-1975 | P | 397 | A | A |
| **Giles et al**[3] | Australia | 1984 | 30 | 2 | Cohort | 1968-1981 | P | 851 | NS | A;R;E |
| **Peat et al**[4] | Australia | 1989 | 89 | 1 | Cohort | 1982-1986 | P | 380 | NS | A |
| **Van Asperen and Kemp**[5] | Australia | 1989 | 55 | 1 | Cohort |  | C | 57 | NS | A;FA;R;E |
| **Peat et al**[6] | Australia | 1990 | 195 | 2 | Cohort | 1982-1986 | P | 380 | NS | A;R;E |
| **Van Asperen et al**[7] | Australia | 1990 | 31 | 0 | Cohort |  | P | 52 | NS | A;R;E |
| **Peat and Woolcock**[8] | Australia | 1991 | 117 | 1 | CS | 1982-1986 | P | 3581 | NS | A;R;E |
| **Toelle et al**[9] | Australia | 1992 | 218 | 2 | CS | 1988-1990 | P | 352 | A | A |
| **Peat et al** [10] | Australia | 1993 | 46 | 1 | Cohort | 1988-1989 | P | 236 | NS | A |
| **Van Asperen and Mukhi**[11] | Australia | 1994 | 31 | 0 | Cohort |  | P | 47 | A | A |
| **Toelle et al** [12] | Australia | 1997 | 9 | 0 | Cohort | 1982-1992 | P | 407 | A | A |
| **Young et al**[13] | Australia | 2000 | 91 | 3 | Cohort | 1987-1991 | P | 160 | A | A |
| **Palmer et al**[14] | Australia | 2001 | 102 | 3 | Cohort | 1987-1991 | C | 120 | A | A |
| **Gibson et al**[15] | Australia | 2001 | 35 | 0 | CS |  | P | 83 | A | A |
| **Ponsonby et al**[16] | Australia | 2002 | 38 | 1 | CS | 1999 | P | 758 | A | A |
| **Kusel et al.**[17] | Australia | 2007 | 192 | 24 | Cohort |  | P | 198 | A | A |
| **Almqvist et al**[18] | Australia | 2007 | 38 | 1 | Cohort | 1997-2004 | P | 375 | A;NS | A;R;E |
| **Lowe et al**[19] | Australia | 2007 | 35 | 3 | Cohort | 1990-1994 | P | 443 | A;R;E | A;R;E |
| **Hollams et al**[20] | Australia | 2009 | 24 | 2 | CS |  | P | 1380 | A | A;R |
| **Schultz et al**[21] | Australia | 2010 | 29 | 5 | Clinical trial |  | C | 109 | A | A |
| **Holt et al**[22] | Australia | 2010 | 27 | 6 | Cohort |  | P | 198 | A | A |
| **Wang et al**[23] | Australia | 2011 | 12 | 7 | CC |  | C | 86 | A | A |
| **Govaere et al**[24] | Belgium | 2009 | 5 | 1 | CS | 2004-2005 | P | 2021 | NS | A;R;E |
| **Lopez et al**[25] | Brazil | 2002 | 11 | 0 | Cohort | 1996-1997 | C | 102 | A | A |
| **Solé et al**[26] | Brazil | 2005 | 32 | 0 | CS | 1999 | P | 6490 | A;R;E | A;R;E |
| **Pereira et al**[27] | Brazil | 2007 | 43 | 1 | CS |  | P | 1982 | A | A |
| **Baehler et al**[28] | Canada | 1996 | 33 | 1 | Case series | 1993-1994 | C | 69 | FA | A;FA;R;U;E;Ana |
| **Lawson et al**[29] | Canada | 2007 | 4 | 0 | Cohort | 2000-2003 | P | 212 | A | A |
| **Castro-Rodriguez et al**[30] | Chile | 2007 | 14 | 0 | CS |  | C | 237 | A | A |
| **Hon et al**[31] | China | 2008 | 16 | 1 | CC | 2008 | C | 105 | E | FA;U;E |
| **Celedón et al**[32] | Costa Rica | 2002 | 13 | 1 | CC | 1998-1999 | P | 198 | A;R;E | A;R;E |
| **Bunyavanich et al**[33] | Costa Rica | 2010 | 6 | 1 | CS | 2001-2006 | P | 616 | A;R | A;R |
| **BraaeOlesen et al**[34] | Denmark | 2001 | 0 | 0 | CS | 1999-2000 | P | 61 | E | E |
| **Johnke et al**[35] | Denmark | 2005 | 30 | 1 | Cohort |  | P | 562 | E | E |
| **Bisgaard et al**[36] | Denmark | 2006 | 219 | 13 | Clinical trial | 1998-2001 | P | 294 | A | A |
| **Halkjaer et al**[37] | Denmark | 2006 | 36 | 3 | Cohort | 1998-2004 | P | 356 | E | E |
| **Johnke et al**[38] | Denmark | 2006 | 28 | 3 | Cohort |  | P | 562 | E | E |
| **Eller et al**[39] | Denmark | 2009 | 17 | 3 | Cohort | 1998-1999 | P | 562 | FA | FA;E |
| **Chawes et al**[40] | Denmark | 2009 | 18 | 2 | Cohort |  | P | 255 | R | R |
| **Kjaer et al**[41] | Denmark | 2009 | 14 | 9 | Cohort | 1998-2005 | P | 404 | NS | A;FA;R;E |
| **Chawes et al**[42] | Denmark | 2010 | 14 | 6 | Cohort |  | C | 290 | A;R | A;R;E |
| **Hyvärinen et al**[43] | Finalnd | 2005 | 24 | 0 | Cohort | 1981-1995 | C | 98 | A | A;R;E |
| **Luoma et al**[44] | Finland | 1983 | 45 | 0 | Cohort | 1971-1978 | P | 543 | A;R;E | A;R;E |
| **Kekki et al**[45] | Finland | 1997 | 46 | 2 | Clinical trial |  | C | 113 | E | FA;E |
| **Tikkanen et al**[46] | Finland | 2000 | 23 | 0 | Cohort | 1986-1997 | C | 260 | FA | A;FA;R;E |
| **Reijonen et al**[47] | Finland | 2000 | 76 | 1 | Clinical trial | 1992-1997 | C | 89 | A | A |
| **Kotaniemi-Syrjänen et al**[48] | Finland | 2002 | 32 | 1 | Cohort | 1992-1999 | C | 82 | A | A;FA;R;E |
| **Hyvärinen et al**[49] | Finland | 2005 | 39 | 7 | Cohort | 1992-2004 | C | 81 | A | A |
| **Saarinen et al**[50] | Finland | 2005 | 106 | 14 | CC | 2003-2004 | P | 118 | FA | A;FA;R;U;E |
| **Jartti et al**[51] | Finland | 2009 | 20 | 6 | CS | 2000-2002 | C | 259 | A | A;FA;E |
| **Delacourt et al**[52] | France | 1994 | 65 | 1 | Cohort | 1990-1993 | C | 67 | A | A |
| **Mortureux et al**[53] | France | 1998 | 66 | 3 | Cohort | 1992-1994 | C | 40 | U | U |
| **Tridon et al**[54] | France | 1999 | 4 | 0 | Case series |  | C | 44 | A | A |
| **Pénard-Morand et al**[55] | France | 2005 | 47 | 2 | CS | 1999-2000 | P | 6672 | A;FA;R | A;FA;R |
| **Herr et al**[56] | France | 2011 | 5 | 6 | Cohort | 2003-2004 | P | 1850 | R | A;R;E |
| **Bergmann et al**[57] | Germany | 1998 | 142 | 3 | Cohort | 1990-1995 | P | 1004 | A;NS | A;R;E |
| **Schäfer et al**[58] | Germany | 1999 | 107 | 4 | CC | 1992-1993 | P | 2201 | E | E |
| **Kulig et al**[59] | Germany | 2000 | 74 | 3 | Cohort | 1990 | P | 587 | R | A;FA;R;E |
| **Illi et al**[60] | Germany | 2001 | 163 | 4 | Cohort | 1990 | P | 939 | A | A |
| **Riedinger et al**[61] | Germany | 2002 | 8 | 0 | Cohort | 1996-1999 | P | 1101 | A;R | A;R |
| **Lau et al**[62] | Germany | 2003 | 32 | 1 | Cohort | 1990-1997 | P | 939 | A | A |
| **Fritz and Herbarth**[63] | Germany | 2004 | 6 | 1 | CS | 1993-1994 | P | 734 | A | A;R;E |
| **Laske and Niggeman**[64] | Germany | 2004 | 40 | 1 | CS |  | C | 345 | E | E |
| **Illi et al**[65] | Germany | 2004 | 246 | 28 | Cohort | 1990 | P | 1123 | A;E | A;E |
| **Niggemann et al**[66] | Germany | 2004 | 19 | 0 | Case series |  | C | 74 | FA;E | FA;E |
| **Illi et al**[67] | Germany | 2006 | 56 | 31 | Cohort | 1990 | P | 1314 | A | A |
| **Brockow et al**[68] | Germany | 2009 | 18 | 4 | Cohort | 1995-1998 | P | 1290 | NS | A;R;E |
| **Schnabel et al**[69] | Germany | 2010 | 13 | 3 | Cohort | 1997-1999 | P | 1082 | FA | FA |
| **Peters et al**[70] | Germany | 2010 | 10 | 4 | Cohort | 1995-2003 | P | 2857 | E | E |
| **Rochat et al**[71] | Germany | 2010 | 18 | 5 | Cohort | 1990 | P | 766 | A;R | A;R |
| **Priftis et al**[72] | Greece | 2008 | 11 | 1 | CC | 1995-1998 | C | 223 | A | A |
| **Hidvegi et al**[73] | Hungary | 2002 | 18 | 1 | Case series |  | C | 80 | FA | FA |
| **Pourpak et al**[74] | Iran | 2007 | 0 | 1 | Case series | 2001-2004 | C | 19 | Ana | FA;Ana |
| **Geller-Bernstein et al**[75] | Israel | 1987 | 22 | 0 | Cohort |  | C | 80 | A | A |
| **Roizin et al**[76] | Israel | 1996 | 4 | 0 | Case series |  | C | 39 | A | A |
| **Novembre et al**[77] | Italy | 1998 | 84 | 8 | Case series | 1994-1996 | C | 76 | Ana | Ana |
| **Patrizi et al**[78] | Italy | 2000 | 18 | 1 | Cohort |  | C | 78 | E | A;E |
| **Pajno et al**[79] | Italy | 2003 | 17 | 1 | Cohort |  | C | 71 | E | E |
| **Peroni et al**[80] | Italy | 2003 | 48 | 4 | CS | 2000-2001 | P | 1121 | R | A;R;E |
| **Fasce et al**[81] | Italy | 2004 | 27 | 2 | Cohort |  | C | 340 | A | A |
| **Fiocchi et al**[82] | Italy | 2004 | 17 | 0 | CS | 2000-2001 | C | 147 | A;E | A;E |
| **Cantani and Micera**[83] | Italy | 2004 | 13 | 1 | Cohort |  | C | 115 | FA | A;FA;R;E |
| **Cardinale et al**[84] | Italy | 2005 | 5 | 0 | CC | 2002-2003 | C | 175 | A;R | A;R |
| **De Sario et al**[85] | Italy | 2006 | 15 | 2 | CS | 2000-2001 | P | 1717 | A | A |
| **Barberio et al**[86] | Italy | 2008 | 10 | 1 | Cohort | 1993-1997 | C | 692 | NS | A;R;E |
| **Jesenak et al**[87] | Italy | 2008 | 3 | 0 | CS | 2005-2006 | P | 532 | NS | A;FA;R |
| **Ciprandi and Capasso**[88] | Italy | 2010 | 5 | 3 | CS |  | C | 200 | R | A;R |
| **Cibella et al**[89] | Italy | 2011 | 2 | 2 | CS | 2005-2006 | P | 2150 | NS | A;R;E |
| **Toyoshima et al**[90] | Japan | 1987 | 3 | 0 | Cohort |  | C | 48 | A | A |
| **Rokaite and Labanauskas**[91] | Lithuania | 2005 | 5 | 0 | CS |  | C | 164 | E | FA;E |
| **Crane et al**[92] | New Zealand | 1989 | 24 | 0 | CS | 1984 | P | 494 | A | A |
| **Nystad et al**[93] | Norway | 1998 | 20 | 0 | CS | 1994 | P | 502 | NS | A |
| **LodrupCarlsen et al**[94] | Norway | 1999 | 24 | 0 | CC | 1992-1994 | P | 165 | A | A |
| **Smidesang et al**[95] | Norway | 2010 | 2 | 0 | Cohort | 2000 | P | 4783 | NS | A;FA;R;E |
| **Bertelsen et al**[96] | Norway | 2010 | 7 | 4 | Cohort | 1992-2002 | P | 1015 | R | A;R;E;Ana |
| **Lang et al**[97] | Norway | 2010 | 11 | 3 | CS | 2006-2007 | C | 115 | A | A;R;E |
| **Jedrychowski et al**[98] | Poland | 2009 | 10 | 2 | Cohort | 2000-2004 | P | 468 | A | A |
| **Czarnobliska et al**[99] | Poland | 2011 | 7 | 0 | CS |  | P | 143 | E | E |
| **Kidon et al**[100] | Singapore | 2011 | 0 | 0 | Case series | 2004-2007 | C | 253 | NS | A;R;E |
| **Chiang et al**[101] | Singapore | 2012 | 1 | 0 | CS | 2001-2009 | C | 6660 | R | A;FA;R;E |
| **Mercer et al**[102] | South Africa | 2002 | 9 | 1 | CS | 1984-1993 | C | 771 | R | A;FA;R;U;E |
| **Lee et al**[103] | South Korea | 2013 | 0 | 0 | CS | 2006-2009 | C | 247 | A | A |
| **Oh et al**[104] | South Korea | 2013 | 0 | 0 | CS | 2010 | P | 372 | A | A |
| **Villa et al**[105] | Spain | 1998 | 25 | 0 | Cohort | 1993-1995 | C | 38 | A | A;FA;E |
| **Martín-Muñoz et al**[106] | Spain | 2008 | 4 | 0 | CS |  | C | 82 | A | A;FA;R;E |
| **Garcia-Marcos et al**[107] | Spain | 2010 | 4 | 0 | CS |  | P | 736 | A;R | A;R |
| **Foucard and Sjöberg**[108] | Sweden | 1984 | 78 | 2 | Cohort | 1968-1970 | C | 80 | A | A |
| **Rylander et al**[109] | Sweden | 1988 | 17 | 0 | Cohort | 1980-1984 | C | 67 | A | A |
| **Croner and Kjellman**[110] | Sweden | 1992 | 99 | 1 | Cohort | 1974-1988 | P | 89 | A | A;R;E |
| **Hattevig et al**[111] | Sweden | 1993 | 152 | 4 | Cohort |  | P | 84 | NS | A;FA;R;U;E |
| **Wennergren et al**[112] | Sweden | 1997 | 67 | 1 | Cohort | 1984-1985 | C | 92 | A | A |
| **Rönmark et al**[113] | Sweden | 1999 | 84 | 5 | CS | 1996 | P | 3431 | A | A |
| **Gustafsson et al**[114] | Sweden | 2000 | 152 | 11 | Cohort |  | C | 94 | A;E | A;FA;R;U;E |
| **Böhme et al**[115] | Sweden | 2002 | 40 | 1 | Cohort | 1994-1996 | P | 3791 | E | A;FA;R;U;E |
| **Wickman et al**[116] | Sweden | 2003 | 38 | 1 | Cohort | 1994-1996 | P | 2614 | NS | A;R;E |
| **Gustafsson et al**[117] | Sweden | 2003 | 34 | 0 | Cohort |  | C | 94 | E | E |
| **Sandin et al**[118] | Sweden | 2004 | 29 | 3 | Cohort | 1996-1997 | P | 1228 | A | A |
| **Ostblom et al**[119] | Sweden | 2007 | 13 | 4 | Cohort | 1999-2000 | P | 2563 | FA | A;FA;R;U;E |
| **Ostblom et al**[120] | Sweden | 2008 | 23 | 4 | Cohort | 1994-1996 | P | 1857 | FA;NS | A;FA;R;E |
| **Arsanoj et al**[121] | Sweden | 2010 | 27 | 11 | CS | 2002-2004 | P | 200 | NS | FA |
| **Westman et al**[122] | Sweden | 2012 | 2 | 9 | Cohort | 1994-2002 | P | 2024 | R | A;FA;R;E |
| **Chang et al**[123] | Taiwan | 2013 | 0 | 0 | Case series | 2002-2006 | C | 165 | U | A;R;U;E |
| **Shen et al**[124] | Taiwan | 2013 | 0 | 1 | Cohort | 2000-2010 | P | 29372 | A;R;E | A;R;E |
| **Sanqsupawanich et al**[125] | Thailand | 2007 | 2 | 0 | Cohort | 2000-2002 | P | 4021 | A;E | A;E |
| **Montefort et al**[126] | The Maltese Islands | 2002 | 14 | 1 | CS |  | P | 3506 | NS | A;R;E |
| **Duiverman et al**[127] | The Netherlands | 1987 | 47 | 0 | CC |  | C | 77 | NS | A |
| **Laan et al**[128] | The Netherlands | 2000 | 30 | 1 | Cohort |  | P | 103 | NS | A;FA;R;E |
| **Brussee et al**[129] | The Netherlands | 2004 | 36 | 5 | CS |  | P | 838 | A | A |
| **Schönberger et al**[130] | The Netherlands | 2004 | 8 | 0 | Cohort | 1967-1989 | C | 1586 | A | A |
| **Brussee et al**[131] | The Netherlands | 2005 | 0 | 0 | Cohort |  | P | 429 | A | A |
| **Jacobs and Brand**[132] | The Netherlands | 2010 | 1 | 0 | Case series | 1990-2003 | C | 244 | NS | A;FA;R;U;E;Ana |
| **Gürkan et al**[133] | Turkey | 2002 | 5 | 0 | Case series | 1995-1997 | C | 61 | A | A |
| **Saraçlar et al**[134] | Turkey | 2003 | 0 | 0 | CS | 1999-2000 | P | 3041 | A | A |
| **Sackesen et al**[135] | Turkey | 2004 | 37 | 3 | CS | 2001-2002 | C | 54 | U | U |
| **Kuyucu et al**[136] | Turkey | 2006 | 25 | 2 | CS | 1999-2000 | P | 2774 | R | A;R;E |
| **Baris et al**[137] | Turkey | 2011 | 1 | 0 | Cohort |  | C | 78 | A | A |
| **Civelek et al**[138] | Turkey | 2011 | 7 | 3 | CS | 2006 | P | 6963 | A | A;R |
| **Yavuz et al**[139] | Turkey | 2011 | 1 | 3 | CS | 2002-2009 | C | 315 | FA | A;FA;R;E;Ana |
| **Keles et al**[140] | Turkey | 2012 | 0 | 0 | CC | 2007-2010 | C | 108 | A | A |
| **Price et al**[141] | UK | 1976 | 11 | 0 | CS | 1974 | C | 42 | E | A;E |
| **Blair et al**[142] | UK | 1977 | 244 | 0 | Cohort | 1948-1972 | C | 244 | A | A;R;E |
| **Gordon et al**[143] | UK | 1982 | 67 | 0 | Cohort |  | C | 250 | A;E | A;E |
| **Lee et al**[144] | UK | 1983 | 203 | 1 | CS | 1979 | P | 2700 | A | A |
| **Park et al**[145] | UK | 1986 | 75 | 0 | Cohort | 1970-1980 | P | 2345 | A | A |
| **Clifford et al**[146] | UK | 1989 | 75 | 1 | CS |  | P | 330 | NS | A |
| **Sporik et al**[147] | UK | 1991 | 167 | 2 | Cohort | 1977-1989 | C | 67 | A | A;R;E |
| **Salob et al**[148] | UK | 1993 | 24 | 0 | CS |  | P | 61 | E | A;E |
| **Wilson et al**[149] | UK | 1995 | 20 | 0 | Case series |  | C | 40 | NS | A |
| **Brooke et al**[150] | UK | 1995 | 88 | 0 | Cohort | 1990-1994 | P | 488 | NS | A |
| **Christie et al**[151] | UK | 1997 | 12 | 0 | CS |  | P | 133 | A | A |
| **Withers et al**[152] | UK | 1998 | 79 | 1 | Cohort | 1987 | P | 2289 | NS | A |
| **Christie et al**[153] | UK | 1999 | 22 | 0 | CS | 1989 | P | 95 | A | A |
| **Clough et al**[154] | UK | 1999 | 52 | 2 | Cohort | 1993-1996 | C | 107 | A | A |
| **McKenzie et al**[155] | UK | 2000 | 47 | 2 | CC |  | C | 203 | A | A |
| **Arshad et al**[156] | UK | 2001 | 154 | 14 | Cohort | 1989-1990 | P | 981 | NS | A;R;E |
| **Sherriff et al**[157] | UK | 2001 | 69 | 3 | Cohort | 1991-1992 | P | 8594 | A | A |
| **Arshad et al**[158] | UK | 2002 | 14 | 3 | Cohort | 1989-1990 | P | 1373 | R | A;FA;R;U;E |
| **Kurukulaaratchy et al**[159] | UK | 2003 | 75 | 9 | Cohort | 1989-1990 | P | 1034 | A | A;FA;E |
| **Kurukulaaratchy et al**[160] | UK | 2003 | 15 | 3 | Cohort | 1989-1990 | P | 1373 | E | A;FA;R;U;E |
| **Kurukulaaratchy et al**[161] | UK | 2003 | 58 | 6 | Cohort | 1989-1990 | P | 1034 | A | A |
| **Kurukulaaratchy et al**[162] | UK | 2004 | 58 | 4 | Cohort | 1989-1990 | P | 1034 | A | A |
| **Ben-Gashir et al**[163] | UK | 2004 | 15 | 1 | Cohort | 1998-1999 | P | 137 | E | E |
| **Perkin et al**[164] | UK | 2004 | 16 | 0 | Cohort | 1991-1992 | P | 2009 | E | E |
| **Kurukulaaratchy et al**[165] | UK | 2004 | 44 | 5 | Cohort | 1989-2000 | P | 1373 | A | A |
| **Lowe et al**[166] | UK | 2005 | 89 | 6 | Cohort |  | P | 874 | A | A |
| **Kurukulaaratchy et al**[167] | UK | 2005 | 51 | 4 | Cohort | 1989-1990 | P | 1456 | NS | A;FA;R;E |
| **Kurukulaaratchy et al**[168] | UK | 2005 | 19 | 3 | Cohort | 1989-2000 | P | 1034 | A | A |
| **Wassall et al**[169] | UK | 2005 | 6 | 1 | CS |  | P | 5998 | A | A |
| **Carroll et al**[170] | UK | 2006 | 23 | 7 | CS | 1999-2001 | C | 400 | A | A |
| **Kurukulaaratchy et al**[171] | UK | 2006 | 24 | 2 | Cohort | 1989-2000 | P | 1373 | A | A |
| **Marinho et al**[172] | UK | 2007 | 42 | 8 | Cohort |  | P | 815 | R | A;R;E |
| **Elphick et al**[173] | UK | 2007 | 10 | 0 | Cohort |  | C | 114 | A | A |
| **Sonnappa et al**[174] | UK | 2010 | 26 | 7 | CC |  | C | 134 | A | A |
| **Fleming et al**[175] | UK | 2012 | 1 | 13 | Cohort | 2005-2008 | C | 79 | A | A |
| **Halonen et al**[176] | USA | 1992 | 87 | 1 | Cohort | 1980-1984 | P | 767 | E;NS | A;E |
| **Martinez et al**[177] | USA | 1995 | 1874 | 87 | Cohort | 1980-1984 | P | 826 | A | A |
| **Stein et al**[178] | USA | 1997 | 159 | 2 | Cohort | 1980-1984 | P | 600 | A | A |
| **Chan et al**[179] | USA | 1998 | 102 | 10 | Case series | 1993-1997 | C | 164 | A | A |
| **Martinez et al**[180] | USA | 1998 | 84 | 1 | Cohort | 1980-1984 | P | 383 | A | A |
| **Sherrill et al**[181] | USA | 1999 | 71 | 0 | Cohort | 1980-1995 | C | 540 | A | A |
| **Halonen et al**[182] | USA | 1999 | 44 | 2 | Cohort | 1980-1984 | P | 741 | A | A |
| **Bansal et al**[183] | USA | 2001 | 4 | 1 | CS |  | C | 483 | A | A |
| **Klinnert et al**[184] | USA | 2001 | 81 | 4 | Cohort | 1985-1987 | P | 150 | A | A |
| **Kelley et al**[185] | USA | 2005 | 17 | 1 | CS | 1988-1994 | P | 5244 | A | A |
| **Morgan et al**[186] | USA | 2005 | 242 | 14 | Cohort |  | P | 826 | A | A |
| **Borish et al**[187] | USA | 2005 | 43 | 5 | CS | 2001 | C | 4756 | A | A |
| **Bacharier et al**[188] | USA | 2007 | 43 | 4 | Clinical trial | 2004 | C | 238 | A | A |
| **Schroeder et al**[189] | USA | 2009 | 31 | 3 | CS |  | C | 567 | A;FA | A;FA |
| **Wegienka et al**[190] | USA | 2009 | 2 | 0 | Cohort | 1987-1995 | P | 724 | A | A |
| **Keet et al**[191] | USA | 2009 | 23 | 5 | Cohort | 1993-2007 | C | 103 | FA | A;FA;R;E;Ana |
| **Wang et al**[192] | USA | 2010 | 33 | 11 | CC |  | C | 41 | FA | FA |
| **Fitzpatrick et al**[193] | USA | 2010 | 29 | 7 | CC |  | C | 53 | A | A |
| **Sala et al**[194] | USA | 2011 | 0 | 0 | CC | 2008-2009 | C | 188 | A | A |
| **Wolkerstorfer et al**[195] | International | 2002 | 40 | 3 | Clinical trial |  | C | 382 | E | FA;E |
| **Karadag et al**[196] | International | 2007 | 13 | 0 | CS | 2000-2002 | P | 14893 | A;E | A;R;E |
| **Pillai et al**[197] | International | 2008 | 13 | 1 | CS |  | P | 1563 | A | A |

CS: cross-sectional; CC: case-control; P: Population-based ; C: Clinical population; A: Asthma and/or wheeze; R: Rhinitis; E: Eczema / Atopic Dermatitis; NS: not specified

# Fig S2. Distribution of the studies per country and year of publication

The Y-axis represents the year of publication of the studies and the X-axis the country in which the study was conducted.

# Table S3. Methodology used in the included studies for each allergic disease

|  | Asthma | Rhinitis | Eczema | FA | Urticaria | Anaphylaxis |
| --- | --- | --- | --- | --- | --- | --- |
|  | N=170 | N=70 | N=88 | N=42 | N=14 | N=7 |
| Questionnaire used,yes | 135(79.4) | 58(82.9) | 67(76.1) | 29(69.1) | 9(64.3) | 4(57.1) |
| Reference provided,yes | 57(42.2) | 26(44.8) | 26(38.8) | 6(20.7) | 1(11.1) | 0(0) |
| Quest administration: |  |  |  |  |  |  |
| Clinical examination alone (CE),yes | 6(4.4) | 3(5.2) | 6(9.0) | 1(3.5) | 1(11.1) | 1(25.0) |
| Personal interview alone (PI),yes | 25(18.5) | 7(12.1) | 8(11.9) | 3(10.3) | 1(11.1) | 2(50.0) |
| Self administered alone (SA),yes | 51(37.8) | 23(39.7) | 24(35.8) | 12(41.4) | 2(22.2) | 1(25.0) |
| Telephone alone (T),yes | 0(0) | 0(0) | 0(0) | 0(0) | 0(0) | 0(0) |
| CE;PI | 9(6,7) | 6(10.3) | 8(11.9) | 7(24.1) | 2(22.2) | 0(0) |
| CE;PI;SA | 3(2.2) | 1(1.7) | 2(3.0) | 0(0) | 0(0) | 0(0) |
| CE;PI;T | 2(1.5) | 1(1.7) | 1(1.5) | 0(0) | 0(0) | 0(0) |
| CE;PI;T;SA | 3(2.2) | 2(3.5) | 2(3.0) | 0(0) | 0(0) | 0(0) |
| CE;SA | 21(15.4) | 8(13.8) | 9(13.4) | 4(13.8) | 1(11.1) | 0(0) |
| CE;T | 1(0.7) | 1(1.7) | 1(1.5) | 0(0) | 0(0) | 0(0) |
| PI;SA | 12(8.9) | 4(6.9) | 3(4.5) | 0(0) | 0(0) | 0(0) |
| PI;T;SA | 1(0.7) | 1(1.7) | 1(1.5) | 1(3.5) | 1(11.1) | 0(0) |
| T;SA | 1(0.7) | 1(1.7) | 2(3.0) | 1(3.5) | 1(11.1) | 0(0) |
|  |  |  |  |  |  |  |
| *Atopy* |  |  |  |  |  |  |
| tIgE,yes | 78(45.9) | 31(44.3) | 45(51.1) | 24(57.1) | 8(57.1) | 4(57.1) |
| sIgE,yes | 51(30.0) | 32(45.7) | 41(46.6) | 28(66.7) | 10(71.4) | 7(100) |
| sIgE to food allergens,yes | 38(74.5) | 26(81.3) | 35(85.4) | 25(89.3) | 9(90.0) | 6(85.7) |
| Number of food allergens |  |  |  |  |  |  |
| 1 | 2(5.3) | 1(3.9) | 2(5.7) | 3(12.0) | 1(11.1) | 1(16.7) |
| 2 | 3(7.9) | 2(7.7) | 4(11.4) | 4(16.0) | 1(11.1) | 0(0) |
| 3 | 3(7.9) | 3(11.5) | 3(8.6) | 1(4.0) | 1(11.1) | 1(16.7) |
| 4 | 8(21.1) | 4(15.4) | 4(11.4) | 2(8.0) | 0(0) | 1(16.7) |
| 5 | 2(5.3) | 1(3.9) | 2(5.7) | 1(4.0) | 1(11.1) | 0(0) |
| 6 | 10(26.3) | 8(30.8) | 10(28.6) | 9(36.0) | 2(22.2) | 1(16.7) |
| 7 | 3(7.9) | 2(7.7) | 1(2.9) | 0(0) | 0(0) | 0(0) |
| 9 | 1(2.6) | 0(0) | 0(0) | 1(4.0) | 0(0) | 0(0) |
| 10 or more | 5(13.2) | 4(15.4) | 6(17.1) | 3(12.0) | 3(33.3) | 1(16.7) |
| Not reported | 1(2.7) | 1(3.9) | 3(8.6) | 1(4.0) | 0(0) | 1(16.7) |
|  |  |  |  |  |  |  |
| sIgE to aeroallergens,yes | 42(82.4) | 24(75.0) | 28(68.3) | 13(46.3) | 6(60.0) | 3(42.9) |
| Number ofaeroallergens |  |  |  |  |  |  |
| 1 | 1(2.4) | 0(0) | 0(0) | 0(0) | 0(0) | 0(0) |
| 2 | 3(7.1) | 2(8.3) | 1(3.6) | 1(7.7) | 0(0) | 0(0) |
| 3 | 0(0) | 0(0) | 0(0) | 0(0) | 0(0) | 0(0) |
| 4 | 8(19.1) | 4(16.7) | 5(17.9) | 1(7.7) | 1(16.7) | 0(0) |
| 5 | 5(11.9) | 3(12.5) | 3(10.7) | 1(7.7) | 1(16.7) | 1(33.3) |
| 6 | 4(9.5) | 1(4.2) | 1(3.6) | 3(23.1) | 0(0) | 0(0) |
| 7 | 1(2.4) | 0(0) | 1(3.6) | 0(0) | 0(0) | 0(0) |
| 8 | 6(14.3) | 4(16.7) | 4(14.3) | 2(15.4) | 0(0) | 0(0) |
| 9 | 1(2.4) | 1(4.2) | 1(3.6) | 0(0) | 0(0) | 0(0) |
| 10 or more | 10(23.8) | 7(29.2) | 7(25.0) | 3(23.1) | 3(50.0) | 1(33.3) |
| Not reported | 4(9.5) | 2(8.3) | 5(17.9) | 2(15.4) | 1(16.7) | 1(33.3) |
|  |  |  |  |  |  |  |
| SPT,yes | 111(65.3) | 43(61.4) | 52(59.1) | 27(64.3) | 9(64.3) | 5(71.4) |
| SPT to food allergens,yes | 54(48.7) | 28(65.1) | 39(75.0) | 24(88.9) | 9(100) | 5(100) |
| Number of food allergens: |  |  |  |  |  |  |
| 1 | 4(7.4) | 1(3.6) | 1(2.6) | 2(8.3) | 0(0) | 1(20.0) |
| 2 | 11(20.4) | 4(14.3) | 6(15.4) | 1(4.2) | 0(0) | 0(0) |
| 3 | 7(13.0) | 6(21.4) | 6(15.4) | 5(20.8) | 2(22.2) | 1(20.0) |
| 4 | 7(13.0) | 5(17.9) | 5(12.8) | 1(4.2) | 0(0) | 1(20.0) |
| 5 | 7(13.0) | 4(14.3) | 4(10.3) | 3(12.5) | 2(22.2) | 0(0) |
| 6 | 5(9.3) | 2(7.1) | 2(5.1) | 1(4.2) | 0(0) | 0(0) |
| 7 | 5(9.3) | 3(10.7) | 5(12.8) | 4(16.7) | 3(33.3) | 1(20.0) |
| 8 | 1(1.9) | 0(0) | 1(2.6) | 0(0) | 0(0) | 0(0) |
| 9 | 2(3.7) | 1(3.6) | 1(2.6) | 2(8.3) | 0(0) | 0(0) |
| 10 or more | 3(5.6) | 2(7.1) | 6(15.4) | 4(16.7) | 2(22.2) | 1(20.0) |
| Not reported | 2(3.7) | 0(0) | 2(5.1) | 1(4.2) | 0(0) | 0(0) |
|  |  |  |  |  |  |  |
| SPT to aeroallergens,yes | 109(98.2) | 41(95.4) | 47(90.4) | 20(74.1) | 7(77.8) | 3(60.0) |
| Number of aeroallergens: |  |  |  |  |  |  |
| 2 | 3(2.8) | 0(0) | 0(0) | 0(0) | 0(0) | 0(0) |
| 3 | 8(7.3) | 3(7.3) | 2(4.3) | 0(0) | 0(0) | 0(0) |
| 4 | 7(6.4) | 3(7.3) | 4(8.5) | 3(15.0) | 1(14.3) | 0(0) |
| 5 | 9(8.3) | 2(4.9) | 3(6.4) | 2(10.0) | 0(0) | 0(0) |
| 6 | 10(9.2) | 2(4.9) | 3(6.4) | 0(0) | 0(0) | 0(0) |
| 7 | 17(15.6) | 5(12.2) | 7(14.9) | 4(20.0) | 2(28.6) | 0(0) |
| 8 | 8(7.3) | 3(7.3) | 2(4.3) | 0(0) | 0(0) | 0(0) |
| 9 | 7(6.4) | 5(12.2) | 5(10.6) | 4(20.0) | 1(14.3) | 0(0) |
| 10 or more | 34(31.2) | 16(39.0) | 18(38.3) | 6(30.0) | 3(42.9) | 3(100) |
| Not reported | 6(5.5) | 2(4.9) | 3(6.4) | 1(5.0) | 0(0) | 0(0) |
|  |  |  |  |  |  |  |
| Patch test,yes | 3(1.8) | 2(2.9) | 6(6.8) | 5(11.9) | not measured | not measured |
| Number of aeroallergens: |  |  |  |  |  |  |
| 2 | 0(0) | 0(0) | 1(16.7) | 0(0) | not measured | not measured |
| 3 | 0(0) | 0(0) | 1(16.7) | 1(20.0) | not measured | not measured |
| 4 | 1(33.3) | 1(50.0) | 0(0) | 1(20.0) | not measured | not measured |
| 7 | 0(0) | 0(0) | 1(16.7) | 1(20.0) | not measured | not measured |
| 8 | 1(33.3) | 1(50.0) | 1(16.7) | 1(20.0) | not measured | not measured |
| 25 | 0(0) | 0(0) | 1(16.7) | 1(20.0) | not measured | not measured |
| Not reported | 1(33.3) | 0(0) | 1(16.7) | 0(0) | not measured | not measured |
|  |  |  |  |  |  |  |
| FªHº of allergies |  |  |  |  |  |  |
| Mother,yes | 118(69.4) | 47(67.1) | 61(69.3) | 26(61.9) | 8(57.1) | 4(57.1) |
| Father,yes | 113(66.5) | 46(65.7) | 60(68.2) | 25(59.5) | 8(57.1) | 4(57.1) |
|  |  |  |  |  |  |  |
| *Lung function tests* |  |  |  |  |  |  |
| Spirometry,yes | 71(41.8) | 22(31.4) | 22(25.0) | 8(19.1) | 1(7.1) | 2(28.6) |
| Post bronchodilator test,yes | 13(18.3) | 4(18.2) | 2(9.1) | 1(12.5) | 0(0) | 1(50.0) |
| Peak flow,yes | 17(10.0) | 3(4.3) | 4(4.6) | 3(7.1) | 0(0) | 0(0) |
| BHR,yes | 59(34.7) | 19(27.1) | 19(21.6) | 6(14.3) | 1(7.1) | 1(14.3) |
| BHR method: |  |  |  |  |  |  |
| EVH(Eucapnic voluntary hyperpnoea) | 3(5.1) | 2(10.5) | 2(10.5) | 0(0) | 0(0) | 0(0) |
| Exercise | 6(10.2) | 3(15.8) | 3(15.8) | 3(50.0) | 0(0) | 0(0) |
| Histamine | 19(32.2) | 5(26.3) | 6(31.6) | 0(0) | 0(0) | 0(0) |
| Hypertonic Saline | 4(6.8) | 2(10.5) | 2(10.5) | 0(0) | 0(0) | 0(0) |
| Methacoline | 23(39.0) | 5(26.3) | 4(21.1) | 3(50.0) | 1(100) | 0(0) |
| Exercise;Histamine | 1(1.7) | 1(5.3) | 1(5.3) | 0(0) | 0(0) | 0(0) |
| Methacoline;Exercise | 2(3.4) | 1(5.3) | 1(5.3) | 0(0) | 0(0) | 1(100) |
| Methacoline;Hypertonic Saline | 1(1.7) | 0(0) | 0(0) | 0(0) | 0(0) | 0(0) |
|  |  |  |  |  |  |  |
| Biomarkers collected,yes | 41(24.1) | 14(20.0) | 16(18.2) | 10(23.8) | 3(21.4) | 2(28.6) |
| Disease severity measured,yes | 54(31.8) | 19(27.1) | 35(39.8) | 16(38.1) | 2(14.3) | 1(14.3) |
|  |  |  |  |  |  |  |
| *Health inequality* |  |  |  |  |  |  |
| Race,yes | 28(16.5) | 6(8.6) | 8(9.1) | 3(7.1) | Not measured | Not measured |
| Parental education,yes | 34(20.0) | 11(15.7) | 11(12.5) | 6(14.3) | 1 (7.1) | Not measured |
| SES,yes | 42(24.7) | 19(27.1) | 24(27.3) | 11(26.2) | 2(14.3) | Not measured |

Data are expressed as N(%); FA: food allergy; N refers to the number of studies assessing the specific allergic disease alone or in comorbidity

##

## Table S4. Published classifications of asthma/wheeze in children

| **Defining trait** | **Phenotype terms** | **Definitions** | **Characteristics** | **References** | **Comments** |
| --- | --- | --- | --- | --- | --- |
| **Symptoms with/without temporal pattern** | Transient early wheeze; Late-onset wheeze; Persistent wheeze | *Transient early wheeze*: (1) Children that had at least one lower respiratory tract illness with wheezing during the first three years of life but had no wheezing at six years of age; (2) Children that had no wheezing before the age of three years but had wheezing at the age of six years, (3) Children that had wheezing both before three years of age and at six years of age  *Late-onset wheeze*: (1) Children that had at least one lower respiratory tract illness with wheezing during the first three years of life but had no wheezing at six years of age; (2) Children that had no wheezing before the age of three years but had wheezing at the age of six years, (3) Children that had wheezing both before three years of age and at six years of age  *Persistent wheeze:* Children that had wheezing both before three years of age and at six years of age | *Transient early wheeze*: children that had diminished airway function (length-adjusted maximal expiratory flow at functional residual capacity [Vmax FRC]) both before the age of one year and at the age of six years, were more likely than the other children to have mothers who smoked but not mothers with asthma, and did not have elevated serum IgE levels or skin-test reactivity  *Late-onset wheeze*: did not have significantly elevated serum IgE levels as compared with those who had never wheezed and had lung function at the age of six whichwas within the normal range.  *Persistent wheeze*: were more likely than the children who never wheezed to have mothers with a history of asthma (P<0.001), to have elevated serum IgE levels (P<0.01) and normal lung function in the first year of life, and to have elevated serum IgE levels (P<0.001) and diminished values for Vmax FRC (P <0.01) at six years of age. | Leading reference: 177  Other: 3, 17, 22, 24, 36, 62, 75, 85, 98, 100, 104, 105, 118, 129, 131, 140, 150, 152, 157, 159, 161, 166, 168, 178, 180, 181, 186 | Some studies have used a similar approach but assessed them at different ages |
| Acute/Stable asthma | *Acute asthma (AA)*: had asthma diagnosed by a respiratory paediatrician based on clinical and lung function criteria and had an acute exacerbation of asthma, as described previously.  *Stable asthma (SA)*: had asthma diagnosed by a respiratory paediatrician based on clinical and lung function criteria and had no recent (past 4 weeks) respiratory infection, asthma exacerbation or medication change | In children AA the predominant phenotype was eosinophilic followed by mixed granulocytic.They had lower lymphocyte counts than SA, had greater lung function impairment than adult AA, and had significantly greater airflow obstruction, with lower FEV 1% predicted values than SA.  In children SA the predominant phenotype was the eosinophilic subtype, showed better lung function, with higher FEV1 % pred. values than adult SA. | 23; 194 |  |
| Chronic (persistent) asthma | *Chronic persistent asthma*: symptoms present more than twice a week for at least 3 consecutive months: a) Asthma symptoms limiting participation in daily activities (including sport and leisure); b) Nocturnal awakenings because of asthma symptoms | Chronic persistent asthma subgroup demonstrated significantly reduced lung function (PD20methacholine ≤0.14µmol), increased IgE, allergic poly-sensitization and impaired QoL, similar to that in patients pre-defined as Problematic severe asthma. | 97, 142 | Children with Chronic persistent asthma and those who are symptomatic predominantly during exacerbations may represent distinct phenotypes of childhood asthma with different clinical prognoses  Classification within the Chronic persistent asthma subgroup was found to be a significant explanatory factor for reduction in lung function, PAQLQ and increasing FENO, but not for BHR. |
| Intermittent asthma/wheeze | *Intermittent asthma*: Negative answers to the following questions: daytime symptoms > 1/week? Nighttime symptoms > 1/month? Treatment with inhaled steroid? | *Severe intermittent wheezing* as a distinct phenotype of wheezing during early childhood and is particularly characterized by more severe acute episodes requiring oral corticosteroids separated by asymptomatic periods.  *Mild intermittent asthma:* increased total IgE levels predict high eNO levels better than allergic sensitization in these children | 84, 170, 188 | These findings suggest that in preschool children with intermittent wheezing, episodes can be severe, with greater severity associated with previous episodes requiring oral corticosteroid use and with allergic sensitization.  Increasing total serum IgE but not SPT is associated with a highly significant increase in asthma severity score |
| **Factors/Trigger** | Multi-trigger wheeze; Episodic (viral) wheeze; Virus-associated/Viral wheeze | Episodic viral wheeze or Virus-associated wheeze: a) wheezing only during colds and not in the absence of colds  b) those children who wheezed only with discrete viral respiratory tract infections and were asymptomatic between episodes.  Multiple trigger wheeze:  a) wheeze in the absence of colds, irrespective of the presence or absence of wheeze with colds  b) those who wheezed with viral respiratory tract infections but were also symptomatic between episodes with other triggers, such as dust allergy, tobacco smoke, exercise, and cold air | *Virus-associated/Viral wheeze vs Multi-trigger wheeze*: more likely to be male, to be younger, and to have less frequent wheezy episodes. They were less likely to have night cough, shortness of breath or chest tightness, to have a personal or parental history of atopic disorders, to have a diagnosis of asthma, or to be receiving asthma treatment | 21, 36, 149, 169, 174 | Viruses were not reported. |
| Respiratory syncitial virus induced wheeze/bronchiolitis | RSV/(B or LRI): those with bronchiolitis characterized by widespread crepitations with or without wheeze; RSV/(W OR LRI): those with wheeze alone viral associated wheeze  *rhinoviruses, other picornaviruses (coxsackie, echo, and enteroviruses), coronaviruses 229E and OC43, RSV, influenza A and B, parainfluenza viruses 1-3, adenoviruses, human metapneumovirus, Chlamydia pneumoniae, and Mycoplasma pneumoniae | *RSVW vs RSVB*: more likely to have evidence of allergic sensitization, more likely to have wheeze most days with colds, more likely to have ruttles and occasional ruttles most days with colds, 0.2,5.1). Cough was also more common both with colds, and have increased symptoms and increased use of inhaled steroids  . | 17, 173, 176 | Viruses were not reported (173). |
| Alternaria-positive asthma; Alternaria-negativeasthma | When compared with asthma among *Alternaria*-positive subjects,*Alternaria*-negative asthma is accompanied by lower levels of total IgE, independence from skin test reactivity to aeroallergens, greater prevalence of wheezing LRIs in the first year of life, earlier asthma diagnosis, and an increased asthma remittance rate by age 11 | *Alternaria-negative asthma vsAlternaria-positive asthma*: lower levels of total serum IgE, no relation to local aeroallergen skin tests, a younger age at diagnosis, greater remittance by age 11, and more frequent wheezing lower respiratory illnesses (LRIs) in the first year of life. | 182 | Viruses were not reported. |
| Solitary Exercise-induced bronchoconstriction | Exercise-induced asthma or exercise-induced bronchoconstriction (EIB) is typically characterized by a history of coughing or wheezing, or a history of shortness of breath with exercise | *Solitary EIB versus Chronic asthma with and without EIB*: There were no differences between groups in asthma severity, sex, present age, asthma onset age, EIB onset age, evolution time of asthma, eczema or food allergy. Atopic familiar disorders did not demonstrate differences except to familiar eczema group solitary EIB vschronic asthma without EIB. | 106 | Viruses were not reported. |
| **IgE sensitization** | Atopic and non-atopic asthma | *AA* children positive to SPT; *non-AA* children negative to SPT | *AA*: have more severe exacerbations of asthma in the previous year (ie, more emergency department visits and more oral corticosteroids courses) and have more frequent markers of atopy (nasal eosinophilia), allergic diseases (dermatitis) and steroids use.  *Non-AA*: have a significantly earlier onset of asthma, more past pneumonia episodes, and heavier tobacco consumption at home. | 16, 27, 30, 67, 113, 133, 137, 138, 151, 153, 165, 178, 185 |  |
| Monosensitised/polysensitised asthmatics | *Monosensitised/polysensitised asthmatics*: For each allergic children a score was done by adding the number of positive allergen at SPT. The score started from 1 (monosensitization) . | *Monosensitization*: predominant at age 3 and 7.  *Polisensitization*: predominant at age 11. The behavior of allergen sensitization seems to depend more on the age than on the period of symptom appearance | 54, 81 |  |
| **Inflammation** | Eosinophilic asthma/ Neutrophilic/ Mixed granulocytic/ Paucigranulocytic asthma | Eosinophilic asthma: subjects with >3% sputum eosinophils;  Non-eosinophilic asthma: patients without sputum eosinophilia  Neutrophilic asthma: those with >61% sputum neutrophils and <3%; Mixed granulocytic asthma: subjects with >61% sputum neutrophils and sputum >3% eosinophils; Paucigranulocytic asthma: those with <61% sputum neutrophils and <3% eosinophils | *Eosinophilic asthma vs Non-eosinophilic asthma*: more frequent moderate-to-severe asthma, higher blood eosinophil counts and serum eosinophil cationic protein, lower forced expiratory volume in 1 sec, the sputum eosinophil counts increased with increasing asthma severity. No significant differences were observed between the groups with regard to age, sex, family history of atopy, secondary smoking or asthma exacerbations.  In children acute asthma the predominant phenotype was eosinophilic followed by mixed granulocytic. In children stable asthma the predominant phenotype was the eosinophilic subtype. | 15, 23, 103 | These phenotypes served as the basis to distinguish acute and stable asthma in children (see *Symptoms with/without temporal pattern*) |
| **Severity** | Asthma/wheeze severity | *Mild asthma*: mild and infrequent asthma symptoms, symptom control with a β2-agonist p.r.n alone and need of a β2-agonist not exceeding 3 doses/week; *Mild wheeze*: without hospital admission or oral steroids and bronchodilator use on average less than three days per week in the absence of viral infections  *Moderate asthma*: had more frequent asthma symptoms and required more than 3 doses/week of a β2- agonist. These children were symptom-free when they received maintenance treatment with sodium cromoglycate or inhaled steroids at doses of 200-400 µg/day. With such maintenance treatment they had little need of extra β2- agonists (not exceeding 3 dose/week);  *Severe asthma*: had acute exacerbations in spite of treatment with low to moderate doses of inhaled steroids. They needed high doses of inhaled steroids or inhaled steroids in combination with a long-acting inhaled β2-agonist to be symptom-free (**112**); *Severe wheeze*: if a severe attack with a viral infection had occurred necessitating use of oral steroids or hospital admission, nights disturbed more than twice weekly, or exercise induced or nocturnal symptoms resulted in bronchodilator use more than an average of three days per week, in the absence of viral infections (**149**) | *Mild asthma:* usually began later in childhood, was episodic, and there was little or no evidence of airways obstruction between attacks. The attacks generally stopped before 10 years of age. IgE geometric mean values were lower compared to moderate and severe asthmatics.  *Moderate asthma*: had no evidence of endobronchial lesions or chronic aspiration.  *Severe asthma:* severe asthma exacerbation had significantly higher modified Pulmonary Index Score (MPISs) upon admission to the hospital and were significantly more likely to use ICS than children with acute asthma admitted to the ward, had significantly shorter durations of illness prior to being admitted to the hospital compared to those with a non-severe exacerbation. allergic or irritant triggers and a more rapid onset of illness were associated with more severe disease in this population.  Severe persistent asthma: onset usually in the first three years of life, a high frequency of attacks in the initial year, clinical and physiological evidence of persisting airways obstruction and pulmonary hyperinflation, chest deformity, and impairment of growth*.* | 2, 20, 49, 84, 112, 142, 149, 170, 175, 187, 188, 193, 194 | Severe asthma in children is associated with unique patterns of airway inflammation that persist despite corticosteroid treatment. However, no differences in sputum cellularity between the mild to moderate and severe asthma groups.  Neither the response to a direct nor an indirect challenge relates to the pattern or severity of symptoms in 5-6 year old children with active wheeze or a past history of wheeze. |
| **Treatment response** | Steroid-sensitive asthma; Steroid-insensitive asthma | SS asthmatic subjects were defined as those whose AM prebronchodilator FEV1 improved by greater than 15% after the GC burst; SI asthmatics: those failing to respond to the GC burst with a less than 15% improvement in their AM prebronchodilator FEV1 | *Steroid-sensitive asthma vs Steroid-insensitive asthma*:had a similar duration of asthma, they required oral GC therapy at a younger age, required a larger maintenance oral GC dose on admission, and were more likely to be African-American. Two distinct spirometry patterns were noted among the SI asthmatic subjects: “chaotic” and “non-chaotic.” Patients with the chaotic pattern were characterized by a significant degree of variability (greater than 30%) in daily pulmonary function, whereas those with nonchaotic, SI asthma were characterized by less than 15% variability in daily lung function, and treated with oral GCs at a later age. | 179 |  |
| Difficult-to-treat asthma | The physician considered their asthma difficult to treat assessed on specified parameters (i.e., complex treatment regimen, multiple drugs required, unable to avoid triggers, frequent exacerbations, severe exacerbations, and/or unresponsive to therapy) | Mostly male in the pediatric and adolescent patients (in adults female were predominant), younger patients have higher IgE levels. In children, IgE levels increase with increasing asthma severity. Pediatric patients with severe disease have higher mean IgE levels (280.2 IU/mL) than those with moderate disease (145.8 IU/mL) or mild disease (137.8 IU/mL). A similar trend is seen in adolescent patientsbut did not reach statistical significance. | 187 |  |
| Well-controlled asthma | Those asthmatics who were not included in the Exacerbations or Chronic persistent asthma | Used as a control group (see Chronic persistent asthma and problematic severe asthma) | 97 |  |
| **Comorbidity** | Wheezing with rhinoconjunctivitis (RCW);Wheezing with rhinitis (RW) | RW and RCW were defined as having rhinitis and rhinoconjunctivitis in the past year, respectively, in addition to current wheezing symptoms | *Associations with RW*: Male gender, history parental asthma and/or rhinitis, presence of dampness and mold in the house lived in during the first year of life and over the past year, living in a one-room house, monthly family income of <350 US$, history of maternal smoking during pregnancy, exposure to smoke in the house over the past year, and presence of atopic dermatitis.  *Associations with RCW*: history of parental asthma and/or rhinitis, presence of dampness and mold in the house lived in during the first year of life and over the past year, living in a one room house, monthly family income of <350 US$ history of maternal smoking during pregnancy, exposure to smoke in the house over the past year, and presence of atopic dermatitis. Additionally, duration of breastfeeding per additional month was found to be independent risk factors for RCW. | 138 |  |
|  | Asthma without allergy; Asthma with allergy (hay fever, rhinitis, dermatitis, neurodermatitis) | Children were classified as having asthmatic disease, when a positive response was obtained to individually delineated questions with regard to the specific diagnoses, summarized here as “Has a physician ever diagnosed asthma, asthma bronchiale, asthmatic or spastic bronchitis in your child?”. Allergic disorders were defined as a positive answer to “Has a physician ever diagnosed allergies, hay fever, allergic rhinitis, atopic dermatitis, neurodermitis, etc. in your child?”. As it was known that a formal diagnosis of “allergies” was not readily made by local physicians, additional questions were concerned with a child's symptomatology and the parents' assessment of their child's allergy status. | Asthma without a reported diagnosis of allergies or symptoms was much more prevalent than expected and was reported more frequently in areas with coal-heating; Asthma with allergies was less prevalent occurred more often in areas with heavy traffic and district heating. | 63 | This suggests that environmental exposures (i.e., complex pollution mixtures associated with residential coal-heating and/or traffic) may have differentially influenced the phenotypic expression of asthma. |
| AE + EIA; AD and current asthma; AD and wheeze; Eczema-asthma syndrome |  |  | 65, 141, 143, 148 | See table 3 |

## Table S5. Published classifications of eczema/atopic dermatitis in children

| **Defining trait** | **Phenotype terms** | **Definitions** | **Characteristics** | **References** | **Comments** |
| --- | --- | --- | --- | --- | --- |
| **Symptoms with/without temporal pattern** | Early-onset intermittent AD; Late-onset intermittent;Intermittent eczema | *Early-onset intermittent AD*: before 18 months of age  *Late-onset intermittent AD*: 18–42 months of age  *Intermittent eczema*: those who have a diagnosis of eczema after the age of 36 months but not every year | *Early-onset intermittent AD*: Levels of total IgE at 8, 12 and 18 months of age were associated with early onset of *AD.* | 124; 164 | Early measurement of total immunoglobulin E is of little clinical use in predicting subsequent risk of visible eczema |
| Early AD; Transient eczema; Persistent AD/eczema; Late-onset eczema | *Early AD*: onset of disease in the first 2 years of life  *Transient eczema*: those with a diagnosis of eczema before 36 months of age  *Persistent eczema*: those with a diagnosis of eczema throughout the study from baseline until follow-up  *Late-onset eczema*: those with a diagnosis of eczema after 36 months of age | *Early AD:* is associated with asthma at school age, but in many of these asthmatic children, wheezing manifests before or with the onset of AD.  *Transient eczema*: are less associated with asthma and AR at age 7  *Persistent eczema*: highly associated with asthma and AR at age 7 years but to a lesser extent than those with late-onset eczema.  *Late-onset eczema*: is particularly highly associated with asthma and AR at age 7 years. | 65, 70, 79, 124, 164 | Major determinants of the prognosis of early AD were severity of disease and early atopic sensitization |
| **Factors/Trigger** | - | | | | |
| **IgE sensitization** | Allergic contact dermatitis | Contact allergy confirmed by a clinically relevant positive patch test result in combination with exposure history, dermatitis history and dermatitis pattern (if present at the time point of the examination) | *ACD*: often coexist with atopic eczema and half of ACD children have flexural eczema, while lacking features sufficient for the diagnosis of AE according to Hanifin and Rajka | 99 | It is an actual problem to differentiate between ACD and atopic eczema on morphological grounds. Morphological features and localization of eczema must always be carefully considered in the broad context of the patient’s history and present status (stigmata of atopy, features of contact sensitization or irritation, comorbidities, functional status of the skin, etc.) |
| Extrinsic AE; Intrinsic AE | Children with and without a reported physician’s diagnosis of asthma or wheezing ever; with (EAE) or without (IAE) atopic sensitization [IgE antibodies to common food (fx5) and/or common inhalant (Phadiatop) allergens’; with or without atopic sensitization to either common food or inhalant allergens; or with and without symptoms or a reported physician’s diagnosis of rhinoconjunctivitis. | The determinants of EAE and IAE did not differ. However, evere LRTI in the first 2 years of life and usage of antibiotics ever were found to be positively related only to AE with asthma, whereas the effect of LRTI on AE without asthma had an opposite effect. | 196 | They identified two phenotypes of AE according to the presence and absence of a diagnosis of asthma and wheeze ever with different risk factors. This differentiation may be more relevant than EAE and IAE to determine the heterogeneity of AE. |
| **Inflammation** | - | | | | |
| **Severity** | Mild AD; Moderate AD; Severe AD | *AD severity*: using objective SCORAD which includes the assessment of two items in a standardized manner: (a) extent (applying the rule of nine) and (b) intensity (erythema, edema/papulation, oozing/crust, excoriation, lichenification and dryness on a scale from 0 to 3). The severity of AD was subsequently categorized into mild (<15 SCORAD points), moderate (15-40 SCORAD points), and severe (>40 SCORAD points) according to the objective components of the index (clinical signs and disease extent), ranging from 0 to 83 points16 (i.e., excluding subjective components pruritus and sleeplessness from the SCORAD index) | Children with severe atopic dermatitis and high IgE levels are at risk for sensitization to food allergens and aeroallergens. There is a correlation between SCORAD index and total serum IgE.  Children with AD whose eczema started during the first year of life were more likely to have severe disease than were those whose eczema started later; a history of atopy (asthma, hay fever, or both) was associated with severe AD; and children with AD who lived in an urban area were at increased risk of severe disease compared with their counterparts who lived in a rural environment.  AD severity worsens when there is an early sensitization to cow's milk or to egg. | 37,64,163,195 | Severity of AD declined with age, with an increased fraction of mild cases and a reduced fraction of moderate severity and no obvious sex difference (37). However, in other studies severity of AD increased with age (64). Those with eczema that commenced during the first year of life, which was accompanied by asthma, hay fever, or both, and associated with living in an urban area, had more severe disease independent of other potential risk factors |
| **Treatment response** | - | | | | |
| **Comorbidity** | AE + EIA; AD and current asthma; AD and wheeze; Eczema-asthma syndrome  Food allergy and atopic eczema; AD with food hypersensitivity; Transient food allergy + AD; Persistent FA + AD  AD + comorbidities (asthma, allergic rhinoconjunctivitis, urticarial) | *AE + EIA*: atopic eczema was made on clinical grounds; a personal or family history of atopy, flexural distribution, and severe pruritus with lichenification and EIA defined according to the percentage fall in peak expiratory flow-rate (PEFR) after exercise;  *AD and current asthma*: AD defined according to Hanifin and Radja criteria and with a diagnosis of asthma by a doctor and symptomatic during the past year that had improved with asthma medication; *AD and wheeze*: AD present if at least one of the following applied: (1) reported diagnosis by the family physician, (2) parental reporting of symptoms of AD, and (3) visible AD at the time of follow-up and any wheezing in the past 12 months;  *Eczema-asthma syndrome*: infants have a familial tendency to respond immunologically to specific antigens in such a way as to become abnormally sensitive to that antigen (and perhaps others) | *AD and wheeze:* Children have a marked loss in lung function.  *AE + EIA*: eczematous children with a history of wheezing have exercise-induced asthma which distinguishes them from AE only. Patients with eczema and no evidence of EIA, normal levels of IgE, and lack of skin sensitivity may well constitute a separate group with a different pathophysiological mechanism for their eczema. | 39, 45, 65, 66, 114, 141, 143, 148, 196 | Early comanifestation of these atopic phenotypes rather than a progressive atopic march.  See table of FA for Food allergy and atopic eczema; AD with food hypersensitivity; Transient food allergy + AD; Persistent FA + AD |

## Table S6. Published classifications of rhinitis/allergic rhinitis in children

| **Defining trait** | **Phenotype terms** | **Definitions** | **Characteristics** | **References** | **Comments** |
| --- | --- | --- | --- | --- | --- |
| **Symptoms with/without temporal pattern** | Seasonal rhinoconjunctivitis and Perennial rhinoconjunctivitis (*Upper-airway allergy)* | *Upper-airway allergy*: seasonal or perennial rhinoconjunctivitis, symptoms of sneezing, redness, itching and tearing of the nose or eyes and/or respiratory complaints. Diagnosis was confirmed by the presence of specific IgE in the plasma (**128**)  *Seasonal allergic rhinitis (SAR)*: he reported seasonal symptoms had to be associated with the respective seasonal sensitization to birch or grass pollen. This specific sensitization had to be detectable notlater than 1 year after the occurrence of symptoms. | Children in which SAR had already developed in the second year all were born in spring or early summer, resulting in at least two seasons of pollen exposure before manifestation of SAR. Risk factors were male sex, atopic mothers and fathers having allergic rhinitis themselves, first-born child, early sensitization to food, and atopic dermatitis. Early wheezing was not associated with SAR. | 59, 128 | The prevalence of upper-airway allergy in the children started to develop after 12 months of life Food-specific antibodies were associated with upper-airway allergy. |
| **Factors/Trigger** | Related to IgE sensitization to food and/or inhalant allergens | | | | |
| **IgE sensitization** | Allergic rhinitis; Non-allergic rhinitis; | *Allergic rhinitis*: defined as a significant problem with sneezing, blocked or runny nose in the past 12 months in periods without accompanying cold or flu with relevant allergic sensitization against ≥1 inhaled allergens (i.e. symptoms during exposure;  *Non-allergic rhinitis*: rhinitis with irrelevant sensitization (i.e. no symptoms during exposure) or no sensitization; | *Allergic rhinitis vs Non-allergic rhinitis*:Sensitization to inhaled allergens at an early age (4 years) precedes the development of allergic rhinitis, whereas symptoms of rhinitis do not. Among 4- and 8-year-olds, allergic rhinitis and nonallergic rhinitis were associated with asthma, eczema, and food hypersensitivity. Twenty-five percent of 8-year-olds with allergic rhinitis also had oral allergy syndrome. | 32, 40, 42, 44, 56, 68, 71, 84, 87, 95, 96, 100, 102, 114, 115, 122 |  |
| **Inflammation** | - | | | | |
| **Severity** | Chronic rhinitis (plus allergic rhinitis) | *Chronic rhinitis*: defined by the presence of episodes of rhinorrhea, post-nasal drip, throat irritation and nasal congestion/blockage and/or attacks of sneezing (apart from periods with colds) that are present on most days for >4 weeks in the past year.  *Allergic rhinitis (AR)*: was defined as a history of any of these symptoms concomitant with a positive SPT. concomitant with a positive SPT; *Non-allergic rhinitis (NAR)*: same as above but with negative SPT | AR is more common in male children, is relatively rare below the age of 2 years, and accounts for two-thirds of all childhood chronic rhinitis and 73.3% of all chronic rhinitis in school-aged children (≥ 6 years old). Children with AR have greater drug hypersensitivity to antipyretic medications; were more likely to have more severe atopic, eye and nasal symptoms, and to require adjunct therapy with inhaled corticosteroids; and were at a greater risk of asthma-related events and hospitalization.  Children with NAR were more likely to be treated with a leukotriene antagonist and had more sleep awakening.  Children with AR experienced more moderate to severe symptoms (nasal itch, sneezing, nasal congestion, and discharge) compared to pre-schoolers with NAR. Sleep awakening predominated in the NAR group at all ages, with symptoms worsening in the older age group. | 101 |  |
| **Treatment response** | - | | | | |
| **Comorbidity** | Wheezing with rhinoconjunctivitis (RCW);Wheezing with rhinitis (RW) | *Wheezing with rhinoconjunctivitis (RCW)*: having rhinoconjunctivitis in the past year, respectively, in addition to current wheezing symptoms  *Wheezing with rhinitis (RW)*: having rhinitis in the past year, respectively, in addition to current wheezing symptoms |  | 138 | See comorbidities in Asthma |

## Table S7. Published classifications of food allergy in children

| **Defining trait** | **Phenotype terms** | **Definitions** | **Characteristics** | **References** | **Comments** |
| --- | --- | --- | --- | --- | --- |
| **Symptoms with/without temporal pattern** | FHS; Transient FHS; Intermittent FHS; Late onset FHS; Persistent FHS | *Food hypersensitivity (FHS)*: symptoms related to ingestion of a certain food such as wheeze, itchy eyes and/or runny nose, facial edema, urticaria, eczema or vomiting/diarrhea  *Transient FHS*: symptoms* between 1 and 4 years of age but not thereafter;  *Intermittent FHS*: symptoms* at 1 and/or 2 years, not at 4 years, but again at 8 years;  *Late-onset FHS*: symptoms* at 4 and 8 years or at 8 yearsonly;  *Persistent FHS*: symptoms* at 1 and/or 2 years, and 4 and 8 years of age. *parentally reported symptoms related to ingestion of a certain food were defined as FHS: wheeze, itchy eyes and/or runny nose, facial edema, urticaria, eczema or vomiting/diarrhea | Children with persistent FHS significantly more often reported occurrence of wheeze, itchy eyes/runny nose, urticaria and eczema as symptoms caused by foods as compared with children with transient FHS. Children with persistent FHS exhibited significantly higher IgE-ab levels to food at both 4 and 8 years of age  as compared with the other phenotypes combined. The pattern of sensitization was very similar in children who never had FHS and children with transient FHS. One-third of the children with persistent FHS children reported to have symptoms related to egg, whereas only 4% of children with late-onset FHS reported egg-related symptoms, and the corresponding figure for intermittent FHS was 10%. Transient, intermittent and persistent FHS, all with an onset before 4 years of age, significantly increased the OR for asthma, AR and eczema at 8 years of age (with the exception of intermittent FHS and eczema). | 39, 120 |  |
| **Factors/Trigger** | Cow’s milk allergy; Peanut allergy; Wheat allergy | *Cow’s milk allergy*: Children with clinical symptoms (urticaria, atopic dermatitis, repeated wheezing episodes, failure to thrive, vomiting, diarrhea, and bloody stools) which ceased upon dietary elimination of cow’s milk proteins and re-appeared on open challenge.  *Peanut allergy*: positive answer to the following question in the 8-year-questionnaire regarding the latest 12-month period: ‘Is your child allergic to any food item?’. Symptom options were ‘nose/eyes symptoms’, ‘mouth-itching’, ‘breathing problems’, ‘vomiting/diarrhea’, ‘eczema’, ‘urticaria’. Reactions to peanut had to be indicated on at least one of these symptoms or reported as ‘excluded from the diet during the last 12 months because of previous symptoms’.  *Wheat allergy*: clinical history consistent with an IgE-mediated allergic reaction on wheat ingestion and a positive wheat IgE test result. | *Cow’s milk allergy*: Gastrointestinal complaints in children with CMA in infancy continue to be common at 10y of age. Although the immediate CMA of infancy had remitted in most of the children by the age of 10y, the subjects suffered from a wide variety of atopic manifestations or consequences, including a high frequency of respiratory allergy, positive skin prick tests and recurrent otitis. Moreover, dose-dependent gastrointestinal milk intolerance seems to persist in a certain proportion of these children. children with CMA achieved tolerance at an age significantly higher than the children with egg or wheat allergy.  *Peanut allergy*: Peanut symptoms were more severe in children with Ara h 1, 2 or 3 reactivity. Children with IgE reactivity both to Ara h 2 and to Ara h 1 or 3 more often reported peanut symptoms than children with IgE only to Ara h 2, particularly respiratory symptoms.  *Wheat allergy*: wheat IgE level was an important prognostic factor predicting resolution of wheat allergy. Wheat IgE levels differed overall in the groups that outgrew wheat allergy compared with those individuals who remained allergic by the end of follow-up, and wheat IgE levels predicted the rate of resolution of allergy. | 46, 73, 83, 121, 191, |  |
| Clinically reactive to all forms of milk; Tolerant to heated milk (HM) products; Outgrown milk allergy | *Clinically reactive to all forms of milk*: patients with milk allergy reactive to all forms of milk products  *Tolerant to heated milk (HM) products*: intermediate group of patients with milk allergy who tolerated heated milk (HM) in the form of muffins, waffles, and pizza but reacted to regular cow’s milk ;  *Outgrown milk allergy*: patients with milk allergy who have outgrown their milk allergy | IgE from patients who have outgrown their milk allergy tended to bind fewer milk peptides compared with IgE from those with persistent milk allergy.  IgE from HM-tolerant subjects bound significantly fewer IgE peptides than that from the allergic group and bound fewer peptides with IgG4 than either those who had outgrown their milk allergy. | 192 |  |
| Cow milk allergy immediate reactors (to cow milk challenge) ; Cow milk allergy delayed reactors | Cow milk allergy immediate reactors (to cow milk challenge): onset of symptoms within 2 minutes up to 2 hours; Cow milk allergy delayed reactors: presenting a history of symptoms after a delay of more than 2 hours | *Delayed vs immediate reactors*: They were younger, the interval between last reaction and study entry was shorter, they manifested their first symptom very early in infancy, within the first month of life and were given cow milk protein containing formulas in the first 2 months of life. | 28 |  |
| **IgE sensitization** | IgE-mediated CMA; non-IgE-mediated CMA; | CMA confirmed by using an elimination challenge test and IgE positivity or negativity to CM (determined to be positive by means of SPT, CAP, or both) | *IgE-mediated CMA vs non-IgE-mediated CMA*: had more frequent asthma, rhinoconjunctivitis, atopic eczema, and sensitization to any allergen, less tolerant to CM at all time points. Urticaria, exanthema, or both were more common, whereas for non-IgE mediated CMA AE and diarrhea were more common. | 50 |  |
| IgE-mediated FA | Children were diagnosed as having IgE-mediated food allergy when they fulfilled both of the following criteria:  1. Presence of specific IgE to at least one type of food as shown by elevated titers of specific IgE (>0.35kU/L) or positive skin-prick test.  2. A consistent and clear-cut history of food-related symptoms that developed in early phase after the ingestion of a certain food or positive open food challenge. | In 189 children (60%)  there was a consistent and clear-cut history relating a specific food type with symptoms and, moreover, 82 (26%) children had a history of anaphylaxis after the incriminating food exposure whereas in the remaining 126 (40%) children, an open challenge test was necessary to confirm the diagnosis of IgE-mediated food allergy. The majority of the children presented with cutaneous symptoms (94%; eczema, urticaria, and angioedema) followed by respiratory symptoms (30.2%; wheezing, dyspnea, rhinitis, cyanosis, and hoarseness), gastrointestinal symptoms (19.4%; oral pruritus, nausea, vomiting, abdominal cramping, and diarrhea), neurological symptoms (2.9%; dizziness, headache, and confusion), and cardiovascular symptoms (1.3%; hypotension, tachycardia, and bradycardia). | 139 | Children with isolated egg allergy have a lower rate of respiratory allergies, whereas children with tree nuts–peanut allergy have a higher rate of pollen but not dust-mite sensitization and a higher rate of asthma. The data also suggest that multisensitized children have a more severe clinical presentation including higher risk of anaphylaxis. |
| **Inflammation** | - | | | | |
| **Severity** | - | | | | |
| **Treatment response** | - | | | | |
| **Comorbidity** | Food allergy and atopic eczema; AD with food hypersensitivity; Transient food allergy + AD; Persistent FA + AD  Oral allergy syndrome | *AD with FHS*: AD diagnosed according to Hanifin-Rajka criteria and FHS when parents reported any adverse reactions to foods in the interview or when a child had a positive outcome in at least one of the follow-up test procedures; food-specific SPT ≥ 3 mm or food-sIgE ≥ class 1; all without a clear-cut negative case history, i.e., the child regularly consumed the culprit food without any symptoms  *Transient FA + AD*: positive first challenge and negative second challenge in AD patients defined by the criteria of Sampson and Seymour modified from Hanifin and Rajka  *Persistent FA + AD*: positive first and positive second challenge in AD patients defined by the criteria of Sampson and Seymour modified from Hanifin and Rajka  *Oral allergy syndrome (OAS)*: itchy mouth from eating apple, peach, kiwi, banana, or raw carrot. | *AD with FHS*: Immediate-type reaction to cow’s milk challenge was associated with SPT positivity, while delayed reactions were related to patch positivity. In infants with positive SPT for cow’s milk, this reaction also tended to occur concomitantly with positive SPT for egg and wheat.  *Transient vsPersisitent FA + AD*: specific IgE as well as total IgE in serum was significantly higher in the persistent FA + AD children, although there was an inconsistent pattern looking at single allergens and there were no significant longitudinal changes between the groups.  *Oral allergy syndrome*: common among school-aged children with allergic rhinitis who are sensitized to birch. | 39, 45, 66, 122 | Food allergy and atopic eczema: not defined |

## Table S8. Published classifications of urticaria in children

| **Defining trait** | **Phenotype terms** | **Definitions** | **Characteristics** | **References** | **Comments** |
| --- | --- | --- | --- | --- | --- |
| **Symptoms with/without temporal pattern** | Single-episode acute urticaria; Recurrent acute urticaria | If the duration of symptom-free periods between urticaria episodes is longer than 6 weeks and if the episodes last less than 6 weeks, urticaria is considered to be “recurrent acute | Angioedema was present in 37.5% of those with the acute single-episode type, in 54% of those with recurrent urticaria. An infectious agent was discovered in 58% of patients in the acute single-episode group, in 31% of patients in the acute recurrent group. | 135 |  |
| **Factors/Trigger** | - | | | | |
| **IgE sensitization** | - | | | | |
| **Inflammation** | - | | | | |
| **Severity** | Acute urticaria; Chronic urticaria | Acute urticaria defined by the recurrence of the lesions over a time period of less than 6 weeks, while chronic urticaria is defined as wheals continuously or intermittently occurring for at least 6 weeks | *Chronic vs acute urticaria*: included older children and more boys, physical factors were the leading cause whereas in acute urticaria infection was the most frequently documented cause, followed by drugs, and food allergies. The frequency of the patients with a personal history of other allergic diseases (allergic rhinitis, asthma, and atopic dermatitis) was similar between the acute and chronic groups, and the most common disease was allergic rhinitis in both groups. There were no statistical differences in total IgE production, positive sensitization to specific allergens and eosinophil percentages between the patients with acute and chronic urticaria. Angioedema was more generalizedin chronic urticaria. | 53, 123, 135 |  |
| **Treatment response** | - | | | | |
| **Comorbidity** | Urticaria with atopic dermatitis; Urticaria without AD/eczema | *Urticaria with atopic dermatitis*: Elevated, itchy hives resembling mosquito bites or blisters “blisters”, coming and going, usually disappearing in 1 or 2 days and Dry skin and itchy rash with typical distribution (face/outer limbs/folds of elbows or behind knees/wrists or fronts of ankles) for ≥ 2 weeks; or doctor’s diagnosis of eczema | Both history and diagnosis of urticaria was significantly associated in AD children compared to non AD children, and the frequency of urticaria was particularly higher when the AD started during the first year of life. Not all the cases of urticaria in AD children were related to food allergy. The increased frequency of urticaria was observed among children with food reactions but also among children with increased rate of infections, indicating that urticaria may be caused by both allergic and nonallergic mechanisms | 31, 115 |  |

# Table S9. Terms used to examine phenotypes in studies assessing single allergic diseases

| **Allergic disease** | **Classification** | **Terms/Phenotypes** | **References** |
| --- | --- | --- | --- |
| Anaphylaxis | Factors/Trigger | Food-dependent IgE-mediated anaphylaxis; Drug-dependent anaphylaxis; Hymenoptera venom-dependent anaphylaxis; Exercise-induced food-dependent anaphylaxis, Vaccine-dependent anaphylaxis; Latex anaphylaxis; Additive anaphylaxis;Immunotherapyanaphylaxis;Idiopathic anaphylaxis | [77] |
| Eczema / Atopic Dermatitis | Related term | Atopic Eczema | [35,58,99] |
| Eczema / Atopic Dermatitis | Related term | Atopic Dermatitis | [34,38,79] |
| Eczema / Atopic Dermatitis | IgE sensitization | Allergic contact dermatitis | [99] |
| Eczema / Atopic Dermatitis | IgE sensitization | Intrinsic AD | [117] |
| Eczema / Atopic Dermatitis | IgE sensitization | Extrinsic AD | [117] |
| Eczema / Atopic Dermatitis | Severity | Mild AD | [37] |
| Eczema / Atopic Dermatitis | Severity | Moderate AD | [37] |
| Eczema / Atopic Dermatitis | Severity | Severe AD | [37,64,163] |
| Eczema / Atopic Dermatitis | Symptoms with or without temporal pattern | Incident AD | [70] |
| Eczema / Atopic Dermatitis | Symptoms with or without temporal pattern | Remittent AD | [70] |
| Eczema / Atopic Dermatitis | Symptoms with or without temporal pattern | Recurrent AD | [70] |
| Eczema / Atopic Dermatitis | Symptoms with or without temporal pattern | Early-onset intermittent AD | [164] |
| Eczema / Atopic Dermatitis | Symptoms with or without temporal pattern | Late-onset intermittent AD | [164] |
| Eczema / Atopic Dermatitis | Symptoms with or without temporal pattern | Persistent AD | [70,79,164] |
| Food Allergy | Symptoms with or without temporal pattern | Doctor-diagnosed Food allergy | [69] |
| Food Allergy | Factors/Trigger | Cow's milk allergy | [73] |
| Food Allergy | Factors/Trigger | Peanut allergy | [121] |
| Food Allergy | Factors/Trigger | Clinically reactive to all forms of milk;Tolerant to heated milk (HM) products;Outgrown milk allergy | [192] |
| Rhinitis | IgE sensitization | Allergic rhinitis | [40] |
| Rhinitis | IgE sensitization | Non-allergic rhinitis | [40] |
| Urticaria | Severity | Acute Urticaria | [53,135] |
| Urticaria | Severity | Chronic urticaria | [135] |
| Urticaria | Symptoms with or without temporal pattern | Recurrent acute urticaria | [135] |
| Asthma and/or wheeze | Inflammation | Eosinophilic bronchitis | [15] |
| Asthma and/or wheeze | Inflammation | Eosinophilic asthma | [103] |
| Asthma and/or wheeze | Inflammation | Non-eosinophilic asthma | [103] |
| Asthma and/or wheeze | IgE sensitization | Wheezy bronchitis | [108,112,145,151] |
| Asthma and/or wheeze | IgE sensitization | Atopic asthma | [16,30,113,133,151,153] |
| Asthma and/or wheeze | IgE sensitization | Non-atopic asthma | [16,27,30,113,133] |
| Asthma and/or wheeze | IgE sensitization | Atopic wheeze | [67,165] |
| Asthma and/or wheeze | IgE sensitization | Non-atopic (never) wheeze | [67,165,178] |
| Asthma and/or wheeze | IgE sensitization | Atopic wheezy bronchitic | [153] |
| Asthma and/or wheeze | IgE sensitization | Non-atopic wheezy bronchitic | [153] |
| Asthma and/or wheeze | IgE sensitization | Early-onset non-atopic asthma | [137] |
| Asthma and/or wheeze | IgE sensitization | Monosensitised asthmatics | [54,81] |
| Asthma and/or wheeze | IgE sensitization | Polysensitised asthmatics | [54,81] |
| Asthma and/or wheeze | Related term | Current asthma | [9,12,17,60,190] |
| Asthma and/or wheeze | Related term | Current asthma with positive BHR | [10] |
| Asthma and/or wheeze | Related term | Current physician-diagnosed atopic asthma | [185] |
| Asthma and/or wheeze | Related term | Current physician-diagnosed non-atopic asthma | [185] |
| Asthma and/or wheeze | Related term | Current wheeze | [4,16,22,60,152,168] |
| Asthma and/or wheeze | Related term | Current BHR | [60] |
| Asthma and/or wheeze | Related term | current cough | [152] |
| Asthma and/or wheeze | Related term | Recent wheeze | [4,12,150] |
| Asthma and/or wheeze | Related term | Occasional wheeze | [76,109] |
| Asthma and/or wheeze | Related term | Recurrent wheeze | [25,94,109] |
| Asthma and/or wheeze | Related term | Resolved physician-diagnosed asthma | [185] |
| Asthma and/or wheeze | Related term | Late-onset cough | [152] |
| Asthma and/or wheeze | Related term | Persistent cough | [152] |
| Asthma and/or wheeze | Related term | New-onset wheeze | [29] |
| Asthma and/or wheeze | Related term | Early life wheezing | [190] |
| Asthma and/or wheeze | Related term | Late life wheezing; | [190] |
| Asthma and/or wheeze | Related term | Wheeze with atopy and BHR | [146] |
| Asthma and/or wheeze | Related term | Past wheeze | [149] |
| Asthma and/or wheeze | Related term | Ex-wheeze | [150] |
| Asthma and/or wheeze | Related term | Early childhood atopics | [171] |
| Asthma and/or wheeze | Related term | Chronic childhood atopics | [171] |
| Asthma and/or wheeze | Related term | Persistent asymptomatics | [150] |
| Asthma and/or wheeze | Related term | Wheezing ex-coughers | [150] |
| Asthma and/or wheeze | Related term | Wheeze | [13,15,27,47,90,93,144,154,155,178] |
| Asthma and/or wheeze | Related term | Asthma | [14,43,47,72,75,90,93,108,127,134,144,145,178,183] |
| Ever asthma | [113] |
| Diagnosis of asthma ever | [60] |
| Active asthma | [27] |
| Asthma and/or wheeze | Related term | Diagnosed asthma | [4,12,130,152] |
| Asthma and/or wheeze | Related term | Obstructive airways disease (OAD) | [94] |
| Asthma and/or wheeze | Related term | BHR | [72,92] |
| Asthma and/or wheeze | Related term | Cough | [15,155] |
| Asthma and/or wheeze | Related term | Respiratory symptoms | [4] |
| Asthma and/or wheeze | Related term | Frequent respiratory symptoms with no asthma diagnosis | [185] |
| Asthma and/or wheeze | Related term | Chest cold | [15] |
| Asthma and/or wheeze | Related term | Childhood asthma | [60,184] |
| Asthma and/or wheeze | Related term | Childhood wheeze | [171] |
| Asthma and/or wheeze | Related term | Infantile asthma | [52] |
| Asthma and/or wheeze | Related term | Infantile bronchiolitis | [127] |
| Asthma and/or wheeze | Related term | Infancy wheeze | [11] |
| Asthma and/or wheeze | Related term | Post infancy wheeze | [11] |
| Asthma and/or wheeze | Symptoms with or without temporal pattern | Intermittent asthma | [170] |
| Asthma and/or wheeze | Symptoms with or without temporal pattern | Early (transient) wheeze | [17,62,85,98,104,118,129,131,140,157,161,166,168,177,178,180,181,186] |
| Asthma and/or wheeze | Symptoms with or without temporal pattern | Late-onset wheeze | [17,62,85,98,104,129,131,152,157,161,166,177,181,186] |
| Asthma and/or wheeze | Symptoms with or without temporal pattern | Persistent wheeze | [17,22,36,62,75,85,98,104,129,131,140,150,152,157,161,166,177,180,181,186] |
| Asthma and/or wheeze | Symptoms with or without temporal pattern | Early-onset persistent wheeze | [118,162,168] |
| Asthma and/or wheeze | Symptoms with or without temporal pattern | Late-onset persistent wheeze | [118,162,168] |
| Asthma and/or wheeze | Symptoms with or without temporal pattern | Acute asthma | [23,194] |
| Asthma and/or wheeze | Symptoms with or without temporal pattern | Stable asthma | [23] |
| Asthma and/or wheeze | Severity | Mild asthma | [2,112] |
| Asthma and/or wheeze | Severity | Mild-moderate asthma | [175] |
| Asthma and/or wheeze | Severity | Moderate asthma | [112,193] |
| Asthma and/or wheeze | Severity | Severe asthma | [112,175,193] |
| Asthma and/or wheeze | Severity | Asthma with severe exacerbations | [194] |
| Asthma and/or wheeze | Severity | Mild wheeze | [149] |
| Asthma and/or wheeze | Severity | Moderate wheeze | [149] |
| Asthma and/or wheeze | Severity | Mild-persistent asthma | [170] |
| Asthma and/or wheeze | Severity | Moderate-persistent asthma | [170] |
| Asthma and/or wheeze | Severity | Severe-persistent asthma | [2,170] |
| Asthma and/or wheeze | Severity | Severe early childhood wheeze | [49] |
| Asthma and/or wheeze | Severity | Severe intermittent wheezing | [188] |
| Asthma and/or wheeze | Factor/Trigger | Episodic (viral) wheeze | [21,36,174] |
| Asthma and/or wheeze | Factor/Trigger | Multi-trigger wheeze | [21,169,174] |
| Asthma and/or wheeze | Factor/Trigger | Virus-associated wheeze | [169] |
| Asthma and/or wheeze | Factor/Trigger | Respiratory syncitial virus induced bronchiolitis (RSVB) | [173] |
| Asthma and/or wheeze | Factor/Trigger | Respiratory syncitial virus induced wheeze (RSVW) | [173] |
| Asthma and/or wheeze | Factor/Trigger | Viral wheeze | [149] |
| Asthma and/or wheeze | Factor/Trigger | Multiple wheeze | [149] |
| Asthma and/or wheeze | Factor/Trigger | Alternaria-negative asthma | [182] |
| Asthma and/or wheeze | Factor/Trigger | Alternaria-positive asthma | [182] |
| Asthma and/or wheeze | Treatment response | Difficult-to-treat asthma | [187] |
| Asthma and/or wheeze | Treatment response | Steroid sensitive (SS) asthma | [179] |
| Asthma and/or wheeze | Treatment response | Steroid insensitive (SI) asthma | [179] |

# Table S10. Terms used to examine phenotypes in studies assessing comorbidity

| **Allergic disease** | **Group** | **Terms/Phenotypes** | **References** |
| --- | --- | --- | --- |
| Asthma and/or wheeze;Eczema / Atopic Dermatitis | Comorbidity | AE + EIA | [141] |
| Asthma and/or wheeze;Eczema / Atopic Dermatitis | Comorbidity | AD and current asthma | [148] |
| Asthma and/or wheeze;Eczema / Atopic Dermatitis | Comorbidity | AD and wheeze | [65] |
| Asthma and/or wheeze;Eczema / Atopic Dermatitis | Comorbidity | Eczema-asthma syndrome | [143] |
| Asthma and/or wheeze;Rhinitis | Comorbidity | Wheezing with rhinoconjunctivitis (RCW);Wheezing wiht rhinitis (RW) | [138] |
| Asthma and/or wheeze;Rhinitis;Eczema / Atopic Dermatitis | comorbidity | Asthma without allergy;Asthma with allergy (hay fever, rhinitis, dermatitis, neurodermatitis) | [63] |
| Food Allergy;Eczema / Atopic Dermatitis | Comorbidity | Food allergy and AE | [45] |
| Food Allergy;Eczema / Atopic Dermatitis | Comorbidity | AD with food hypersensitivity | [39] |
| Food Allergy;Eczema / Atopic Dermatitis | Comorbidity | Transient food allergy + AD; Persistent FA + AD | [66] |
| Food Allergy;Eczema / Atopic Dermatitis | Comorbidity | AD with food hypersensitivity | [39] |
| Asthma and/or wheeze;Eczema / Atopic Dermatitis | Symptoms with or without temporal pattern | AE | [141] |
| Asthma and/or wheeze;Rhinitis;Eczema / Atopic Dermatitis | AE | [19] |
| Food Allergy;Eczema / Atopic Dermatitis | AE | [45] |
| Asthma and/or wheeze;FoodAllergy;Rhinitis;Eczema / Atopic Dermatitis | Symptoms with or without temporal pattern | Eczema | [122] |
| Asthma and/or wheeze;FoodAllergy;Rhinitis;Urticaria;Eczema / Atopic Dermatitis | Eczema | [114,158,160] |
| Asthma and/or wheeze;Rhinitis;Eczema / Atopic Dermatitis | Eczema | [6,18,24,26,32,68,88,126,156] |
| Asthma and/or wheeze;Eczema / Atopic Dermatitis | Eczema | [176] |
| Asthma and/or wheeze;Eczema / Atopic Dermatitis | Symptoms with or without temporal pattern | AD but no history of asthma | [148] |
| Asthma and/or wheeze;Eczema / Atopic Dermatitis | AD | [78,125] |
| Asthma and/or wheeze;FoodAllergy;Rhinitis;Eczema / Atopic Dermatitis | AD | [5,41,83,95,127] |
| Asthma and/or wheeze;FoodAllergy;Rhinitis;Urticaria;Eczema / Atopic Dermatitis | AD | [115] |
| Asthma and/or wheeze;Rhinitis;Eczema / Atopic Dermatitis | AD | [44,57,86,100] |
| Food Allergy;Eczema / Atopic Dermatitis | AD | [91] |
| Food Allergy;Eczema / Atopic Dermatitis | AD | [39] |
| Food Allergy;Urticaria;Eczema / Atopic Dermatitis | AD | [31] |
| Asthma and/or wheeze;Rhinitis;Eczema / Atopic Dermatitis | Related term | AE dermatitis syndrome (AEDS) | [116] |
| Asthma and/or wheeze;Eczema / Atopic Dermatitis | Related term | IgE mediated allergy;Non-IgE mediated allergy | [82] |
| Asthma and/or wheeze;Eczema / Atopic Dermatitis | Related term | Wheeze | [125] |
| Asthma and/or wheeze;FoodAllergy;Rhinitis;Eczema / Atopic Dermatitis | Wheeze | [5,95] |
| Asthma and/or wheeze;Rhinitis | Wheeze | [61] |
| Asthma and/or wheeze;Rhinitis;Eczema / Atopic Dermatitis | Wheeze | [6,18,24] |
| Asthma and/or wheeze;Food Allergy | Related term | Asthma | [189] |
| Asthma and/or wheeze;FoodAllergy;Rhinitis;Eczema / Atopic Dermatitis | Asthma | [41,48,122] |
| Asthma and/or wheeze;FoodAllergy;Rhinitis;Urticaria;Eczema / Atopic Dermatitis | Asthma | [114,115,158] |
| Asthma and/or wheeze;Rhinitis | Asthma | [33,107] |
| Asthma and/or wheeze;Rhinitis;Eczema / Atopic Dermatitis | Asthma | [18,26,32,42,44,49,68,86,116,126,156] |
| Asthma and/or wheeze;FoodAllergy;Rhinitis | Related term | Bronchial asthma | [87] |
| Asthma and/or wheeze;Rhinitis;Eczema / Atopic Dermatitis | Bronchial asthma | [110] |
| Asthma and/or wheeze;FoodAllergy;Rhinitis;Eczema / Atopic Dermatitis | Related term | Asthma-like symptoms | [128] |
| Asthma and/or wheeze;FoodAllergy;Eczema / Atopic Dermatitis | Related term | Bronchiolitis | [51] |
| Asthma and/or wheeze;Rhinitis;Eczema / Atopic Dermatitis | Related term | BHR | [6,8] |
| Asthma and/or wheeze;Rhinitis;Eczema / Atopic Dermatitis | Related term | Productive cough | [3] |
| Asthma and/or wheeze;Rhinitis;Eczema / Atopic Dermatitis | Related term | Lower respiratory tract symptoms (bronchitis; cough; asthma/wheeze) | [1] |
| Asthma and/or wheeze;Eczema / Atopic Dermatitis | Related term | Lower respiratory infection | [176] |
| Asthma and/or wheeze;Rhinitis;Eczema / Atopic Dermatitis | Related term | Impaired lung function | [89] |
| Asthma and/or wheeze;FoodAllergy;Rhinitis;Eczema / Atopic Dermatitis | Related term | Doctor-diagnosed asthma | [95] |
| Asthma and/or wheeze;Rhinitis | Asthma diagnosis | [61] |
| Asthma and/or wheeze;Rhinitis;Eczema / Atopic Dermatitis | Diagnosed-asthma | [6] |
| Asthma and/or wheeze;FoodAllergy;Rhinitis | IgE sensitization | Allergic rhinoconjunctivitis | [87] |
| Asthma and/or wheeze;FoodAllergy;Rhinitis;Eczema / Atopic Dermatitis | Allergic rhinoconjunctivitis | [95] |
| Asthma and/or wheeze;FoodAllergy;Rhinitis;Urticaria;Eczema / Atopic Dermatitis | Allergic rhinoconjunctivitis | [115] |
| Asthma and/or wheeze;FoodAllergy;Rhinitis;Eczema / Atopic Dermatitis | Related term | Rhinoconjunctivitis | [41] |
| Asthma and/or wheeze;Rhinitis;Eczema / Atopic Dermatitis | Rhinoconjunctivitis | [89] |
| Asthma and/or wheeze;Rhinitis | Rhinoconjunctivitis | [107] |
| Asthma and/or wheeze;Rhinitis | IgE sensitization | AR | [33,71,84] |
| Asthma and/or wheeze;FoodAllergy;Rhinitis;Eczema / Atopic Dermatitis | AR | [122] |
| Asthma and/or wheeze;Rhinitis;Eczema / Atopic Dermatitis | AR | [32,42,44,68,100] |
| Asthma and/or wheeze;FoodAllergy;Rhinitis;Urticaria;Eczema / Atopic Dermatitis | AR | [102,114] |
| Asthma and/or wheeze;Rhinitis;Eczema / Atopic Dermatitis | Related term | AR-like symptoms | [56] |
| Asthma and/or wheeze;FoodAllergy;Rhinitis;Eczema / Atopic Dermatitis | Related term | Rhinitis | [5] |
| Asthma and/or wheeze;FoodAllergy;Rhinitis;Urticaria;Eczema / Atopic Dermatitis | Rhinitis | [158] |
| Asthma and/or wheeze;Rhinitis;Eczema / Atopic Dermatitis | Rhinitis | [18,24,26,80,116,126,156] |
| Asthma and/or wheeze;Rhinitis | Symptoms with or without temporal pattern | Runny nose | [61] |
| Asthma and/or wheeze;Rhinitis | Symptoms with or without temporal pattern | Diagnosis of hay fever | [61] |
| Asthma and/or wheeze;Rhinitis;Eczema / Atopic Dermatitis | Symptoms with or without temporal pattern | Hay fever | [6] |
| Asthma and/or wheeze;FoodAllergy;Rhinitis;Eczema / Atopic Dermatitis | Symptoms with or without temporal pattern | Upper-airway allergy (seasonal or perennial rhinoconjunctivitis) | [128] |
| Asthma and/or wheeze;Rhinitis | Symptoms with or without temporal pattern | Perennial AR | [88] |
| Asthma and/or wheeze;FoodAllergy;Rhinitis;Eczema / Atopic Dermatitis | Symptoms with or without temporal pattern | Seasonal AR | [59] |
| Asthma and/or wheeze;Rhinitis;Eczema / Atopic Dermatitis | Related term | Dyspnea;Conjunctivitis | [24] |
| Asthma and/or wheeze;FoodAllergy;Rhinitis;Eczema / Atopic Dermatitis | Symptoms with or without temporal pattern | Food hypersensitivity (FH) | [120,122] |
| Asthma and/or wheeze;FoodAllergy;Rhinitis;Urticaria;Eczema / Atopic Dermatitis | Food hypersensitivity (FHS) | [119] |
| Food Allergy;Eczema / Atopic Dermatitis | Food hypersensitivity | [39] |
| Asthma and/or wheeze;Food Allergy | Symptoms with or without temporal pattern | Food allergy | [189] |
| Asthma and/or wheeze;FoodAllergy;Rhinitis | Food allergy | [55,87] |
| Asthma and/or wheeze;FoodAllergy;Rhinitis;Eczema / Atopic Dermatitis | Food allergy | [128] |
| Asthma and/or wheeze;FoodAllergy;Rhinitis;Urticaria;Eczema / Atopic Dermatitis | Food allergy | [114] |
| Asthma and/or wheeze;FoodAllergy;Rhinitis;Eczema / Atopic Dermatitis | Symptoms with or without temporal pattern | Reported diagnosis of food allergy (RDFA) | [120] |
| Asthma and/or wheeze;FoodAllergy;Rhinitis;Eczema / Atopic Dermatitis | Factors/Trigger | Cow's milk allergy | [46,83] |
| Asthma and/or wheeze;FoodAllergy;Rhinitis;Eczema / Atopic Dermatitis;Anaphylaxis | Factors/Trigger | Wheat allergy | [191] |
| Asthma and/or wheeze;FoodAllergy;Rhinitis;Eczema / Atopic Dermatitis;Anaphylaxis | IgE sensitization | IgE-mediated food allergy | [139] |
| Asthma and/or wheeze;FoodAllergy;Rhinitis;Urticaria;Eczema / Atopic Dermatitis | IgE sensitization | IgE-mediated CMA; non-IgE-mediated CMA | [50] |
| Asthma and/or wheeze;FoodAllergy;Rhinitis;Urticaria;Eczema / Atopic Dermatitis | Related term | Urticaria | [114,115] |
| Food Allergy;Anaphylaxis | Factors7Trigger | Wheat anaphylaxis | [74] |
| Asthma and/or wheeze;FoodAllergy;Rhinitis;Eczema / Atopic Dermatitis | Related term | Oral allergic syndrome | [122] |
| Food Allergy;Urticaria;Eczema / Atopic Dermatitis | Comorbidity | Urticaria without eczema | [31] |
| Asthma and/or wheeze;FoodAllergy;Rhinitis;Eczema / Atopic Dermatitis | factors/Trigger | Solitary Exercise-induced bronchoconstriction | [106] |
| Asthma and/or wheeze;Rhinitis | Related term | Frequent wheezing (FW) | [138] |
| Asthma and/or wheeze;Rhinitis;Eczema / Atopic Dermatitis | Symptoms with or without temporal pattern | EarlyTransient wheeze | [24] |
| Asthma and/or wheeze;FoodAllergy;Eczema / Atopic Dermatitis | (Early) Transient wheeze | [105,159] |
| Asthma and/or wheeze;FoodAllergy;Eczema / Atopic Dermatitis | Symptoms with or without temporal pattern | Late-onset wheeze | [159] |
| Asthma and/or wheeze;Rhinitis;Eczema / Atopic Dermatitis | Late onset wheeze | [24] |
| Asthma and/or wheeze;FoodAllergy;Eczema / Atopic Dermatitis | Symptoms with or without temporal pattern | Persistent wheeze | [105,159] |
| Asthma and/or wheeze;Rhinitis;Eczema / Atopic Dermatitis | Persistent wheeze | [3,24] |
| Asthma and/or wheeze;FoodAllergy;Rhinitis;Eczema / Atopic Dermatitis | Related term | Recurrent wheeze | [5] |
| Asthma and/or wheeze;Rhinitis;Eczema / Atopic Dermatitis | Related term | Recurrent Asthma | [142] |
| Asthma and/or wheeze;Rhinitis;Eczema / Atopic Dermatitis | Related term | Current asthma | [8,89] |
| Asthma and/or wheeze;Rhinitis | Current asthma | [20] |
| Asthma and/or wheeze;Rhinitis;Eczema / Atopic Dermatitis | Symptoms with or without temporal pattern | Chronic Asthma | [142] |
| Asthma and/or wheeze;Rhinitis;Eczema / Atopic Dermatitis | Symptoms with or without temporal pattern | Chronic persistent asthma | [97] |
| Asthma and/or wheeze;Rhinitis;Eczema / Atopic Dermatitis | Symptoms with or without temporal pattern | Persistent asthma | [100] |
| Asthma and/or wheeze;Rhinitis;Eczema / Atopic Dermatitis | Related term | Current allergic symptoms | [24] |
| Asthma and/or wheeze;Rhinitis;Eczema / Atopic Dermatitis | Related term | Current rhinoconjunctivitis | [172] |
| Asthma and/or wheeze;Rhinitis | IgE sensitization | Current allergic rhinoconjunctivitis | [20] |
| Asthma and/or wheeze;Rhinitis;Eczema / Atopic Dermatitis | Symptoms with or without temporal pattern | Current rhinitis | [136] |
| Asthma and/or wheeze;Eczema / Atopic Dermatitis | Symptoms with or without temporal pattern | Early AD | [65] |
| Asthma and/or wheeze;Rhinitis;Eczema / Atopic Dermatitis | Symptoms with or without temporal pattern | Persistent eczema;Intermittenteczema;Transienteczema;Late-onset eczema | [124] |
| Asthma and/or wheeze;Rhinitis;Eczema / Atopic Dermatitis | Related term | Early onset atopy;Late onset atopy | [6] |
| Asthma and/or wheeze;FoodAllergy;Rhinitis;Eczema / Atopic Dermatitis | Related term | Early childhood atopic;Chronic childhood atopic;Delayed childhood atopic | [167] |
| Asthma and/or wheeze;FoodAllergy;Rhinitis;Eczema / Atopic Dermatitis | Symptoms with or without temporal pattern | Transient FHS;IntermittentFHS;Late onset FHS;Persistent FHS | [120] |
| Asthma and/or wheeze;FoodAllergy;Rhinitis;Eczema / Atopic Dermatitis | Factors/Trigger | Immediate food reactions | [5] |
| Asthma and/or wheeze;FoodAllergy;Rhinitis;Urticaria;Eczema / Atopic Dermatitis;Anaphylaxis | Factors/Trigger | Cow milk allergy immediate reactors (to cow milk challenge);Cow milk allergy delayed reactors | [28] |
| Asthma and/or wheeze;FoodAllergy;Rhinitis;Eczema / Atopic Dermatitis | Factors/Trigger | Chronic asthma with Exercise-induced bronchoconstriction;Chronic asthma without Exercise-induced bronchoconstriction;Solitary Exercise-induced bronchoconstriction | [106] |
| Asthma and/or wheeze;Rhinitis | Severity | Mild asthma; Severe asthma | [20] |
| Asthma and/or wheeze;Rhinitis;Eczema / Atopic Dermatitis | Mild Asthma;Severe Asthma | [142] |
| Asthma and/or wheeze;Rhinitis | Severity | Mild intermittent asthma | [84] |
| Asthma and/or wheeze;Rhinitis | Severity | Moderate asthma | [20] |
| Asthma and/or wheeze;Rhinitis;Eczema / Atopic Dermatitis | Severity | Slight to mild BHR;Moderate to severe BHR | [7] |
| Asthma and/or wheeze;Rhinitis;Eczema / Atopic Dermatitis | Severity | Problematic severe asthma;Exacerbations | [97] |
| Asthma and/or wheeze;Rhinitis;Eczema / Atopic Dermatitis | Treatment response | Well-controlled asthma | [97] |
| Asthma and/or wheeze;FoodAllergy;Rhinitis;Eczema / Atopic Dermatitis | Severity | Chronic non-AR;Chronic AR | [101] |
| Asthma and/or wheeze;Rhinitis;Urticaria;Eczema / Atopic Dermatitis | Severity | Acute urticaria;Chronicurticaria | [123] |
| Food Allergy;Eczema / Atopic Dermatitis | Severity | Mild AD;ModerateAD;Severe AD | [195] |
| Asthma and/or wheeze;FoodAllergy;Rhinitis;Urticaria;Eczema / Atopic Dermatitis | Related term | Atopics;Non-atopics | [111] |
| Asthma and/or wheeze;FoodAllergy;Rhinitis;Urticaria;Eczema / Atopic Dermatitis;Anaphylaxis | Related term | Allergic sensitization (monosensitised,polysensitised) | [132] |
| Asthma and/or wheeze;Rhinitis;Eczema / Atopic Dermatitis | Related term | Asymptomatic-sensitized | [19] |
| Asthma and/or wheeze;Rhinitis | IgE sensitization | Atopic wheezing (AW);Non-atopic wheezing (NAW) | [138] |
| Asthma and/or wheeze;Rhinitis;Eczema / Atopic Dermatitis;Anaphylaxis | IgE sensitization | Rhinits without sensitisation to inhalant allergens;Rhinitis with sensitisation to inhalant allergens | [96] |
| Asthma and/or wheeze;Rhinitis | Related term | Atopy without rhinitis | [71] |
| Asthma and/or wheeze;Rhinitis | Related term | Childhood-onset wheezing | [71] |
| Asthma and/or wheeze;Rhinitis;Eczema / Atopic Dermatitis | Childhood wheeze | [147] |
| Asthma and/or wheeze;Eczema / Atopic Dermatitis | Childhood asthma | [65] |
| Asthma and/or wheeze;Rhinitis;Eczema / Atopic Dermatitis | IgE sensitization | Extrinsic AE; Intrinsic AE | [196] |

# Table S11. Related terms used in already defined phenotypes

| BHR | 72, 92 |
| --- | --- |
| Cough (current, persistent, late-onset) | 15, 155 |
| Productive cough | 3 |
| Respiratory symptoms | 4, 8, 185 |
| Chest cold | 15 |
| Asthma (current, recurrent, resolved) | 9, 12, 17, 60, 190 |
| Asthma | 14, 18, 26, 27, 32, 33, 41, 42, 43, 44, 47, 48, 49, 68, 72, 75, 86, 90, 93, 107, 108, 113, 114, 115, 116, 122, 126, 127, 134, 144, 145, 156,158,178, 183, 189 |
| Doctor-diagnosed asthma | 4, 6, 12,60, 61, 95, 130,152 |
| Childhood asthma; Infantile asthma | 52,60,65,184 |
| Bronchial asthma | 87, 110 |
| Asthma-like symptoms | 128 |
| Wheeze (history of, current, occasional, frequent, recurrent, past/ex) | 4, 16, 22, 60, 152, 168 |
| Atopics;Non-atopics | 111 |
| Allergic sensitization (monosensitized,polysensitized) | 132 |
| Early onset atopy;Late onset atopy | 6 |
| Early childhood atopic;Chronic childhood atopic;Delayed childhood atopic | 167 |
| Asymptomatic-sensitized | 19 |
| AtopicEczema | 19, 26, 35, 45, 58, 99, 141 |
| Atopic Dermatitis | 5, 31, 34, 38, 39, 41, 44, 57, 78, 79, 83, 86, 91, 95, 100, 115, 125, 127, 148 |
| Atopiceczemadermatitissyndrome | 116 |
| Allergy symptoms | 24 |

# Discussion

Text-mining techniques performed poorly and the same reviewers who screened the titles also screened the first 600 abstracts from excluded studies by means of a table of random numbers to identify those studies that should have been included but that were excluded by title screening. Only two abstracts were found to be clearly eligible for inclusion. Hence, it was concluded that one of the methodological limitations of this systematic review is that around 45 (0.3%) titles rated as excluded should have been included.

Regarding temporal patterns of asthma/wheeze symptoms, the literature has been dominated by the classification and definition of wheezing as early transient, persistent, and late-onset wheeze [177] which has been largely replicated by many but not all studies, in particular cluster analyses [198].

Several triggers have been reported: episodic (viral) and multiple-trigger wheezing phenotypes based on symptom-pattern [21,36,149,169,174], respiratory syncitial virus induced wheeze/bronchiolitis [17,173,182], Alternaria-sensitization in asthma [38] and exercise-induced bronchoconstriction [106].

Many studies assessedIgE sensitization [16,27,30,67,113,133,137,138,151,153,165,178,185]. It has been argued that stratification by atopy in studies of asthma is preferred to a composite definition [199]. Polysensitization has been studied twice[54,81].

Inflammation is an important criterion distinguishing between eosinophilic, neutrophilic, mixed granulocytic and paucigranulocytic asthma [15,23,103].

Severity was classified as mild, moderate and severe[2,20,49,84,112,142,149,170,175,187,188,193,194]but also as problematic severe asthma [97] and (severe asthma) exacerbations [97,194].

Treatment response allows to distinguish between steroid-sensitive/resistant asthma [179], difficult-to-treat asthma [64] and well/poorly controlled asthma [97]. However, severity is associated with lack of treatment response and degree of inflammation such as eosinophilic or non-eosinophilic asthma, the latter being characterized by poor response to inhalant corticosteroids associated with impaired asthma control [103], although associations between severity and degree of inflammation (eosinophils) remain controversial [200].

A well-documented hallmark of atopic eczema is its heterogeneity in symptoms, location and timing of symptoms as well as triggers[201]. When studying the temporal pattern of eczema, several phenotypes have been described: early-onset (intermittent), transient, late-onset (intermittent) and persistent eczema [65,70,79,124,164] on one hand and incident, remittent and recurrent eczema [70] on the other. In the search for environmental determinants two phenotypes were distinguished: extrinsic (EAE) and intrinsic atopic eczema (IAE) [196]. However, phenotypes defined by concomitant presence or absence of asthma or wheezing ever explained more heterogeneity of AE than the dichotomization into EAE and IAE. Other studies have used SCORAD to objectively examine disease severity of clinically present eczema[37,64,163,195].

# References

1. Hall GJ, Gandevia B, Silverstone H, Searle JH, Gibson HB: The interrelationships of upper and lower respiratory tract symptoms and signs in seven-year-old children. Int J Epidemiol 1972;1:289–405.

2. Mcnicol KN, Macnicol KN, Williams HB: Spectrum of asthma in children. I. Clinical and physiological components. Br Med J 1973 Oct 6;4:7–11.

3. Giles GG, Lickiss N, Gibson HB, Shaw K: Respiratory symptoms in Tasmanian adolescents: a follow up of the 1961 birth cohort. Aust N Z J Med 1984 Oct;14:631–637.

4. Peat JK, Salome CM, Sedgwick CS, Kerrebijn J, Woolcock AJ: A prospective study of bronchial hyperresponsiveness and respiratory symptoms in a population of Australian schoolchildren. Clin Exp Allergy 1989 May;19:299–306.

5. Van Asperen PP, Kemp AS: The natural history of IgE sensitisation and atopic disease in early childhood. Acta Paediatr Scand 1989 Mar;78:239–245.

6. Peat JK, Salome CM, Woolcock AJ: Longitudinal changes in atopy during a 4-year period: relation to bronchial hyperresponsiveness and respiratory symptoms in a population sample of Australian schoolchildren. J Allergy Clin Immunol 1990 Jan;85:65–74.

7. Van Asperen PP, Kemp AS, Mukhi A: Atopy in infancy predicts the severity of bronchial hyperresponsiveness in later childhood. J Allergy Clin Immunol 1990 Apr;85:790–795.

8. Peat JK, Woolcock AJ: Sensitivity to common allergens: relation to respiratory symptoms and bronchial hyper-responsiveness in children from three different climatic areas of Australia. Clin Exp Allergy 1991 Sep;21:573–581.

9. Toelle BG, Peat JK, Salome CM, Mellis CM, Woolcock AJ: Toward a definition of asthma for epidemiology. Am Rev Respir Dis 1992 Sep;146:633–637.

10. Peat JK, Toelle BG, Salome CM, Woolcock AJ: Predictive nature of bronchial responsiveness and respiratory symptoms in a one year cohort study of Sydney schoolchildren. Eur Respir J 1993 May;6:662–669.

11. Van Asperen PP, Mukhi A: Role of atopy in the natural history of wheeze and bronchial hyper-responsiveness in childhood. Pediatr Allergy Immunol 1994 Aug;5:178–183.

12. Toelle BG, Peat JK, van den Berg RH, Dermand J, Woolcock AJ: Comparison of three definitions of asthma: a longitudinal perspective. J Asthma 1997;34:161–167.

13. Young S, Arnott J, O’Keeffe PT, Le Souef PN, Landau LI: The association between early life lung function and wheezing during the first 2 yrs of life. Eur Respir J 2000 Jan;15:151–157.

14. Palmer LJ, Rye PJ, Gibson NA, Burton PR, Landau LI, Lesouëf PN: Airway responsiveness in early infancy predicts asthma, lung function, and respiratory symptoms by school age. Am J Respir Crit Care Med 2001 Jan;163:37–42.

15. Gibson PG, Simpson JL, Chalmers AC, Toneguzzi RC, Wark PA, Wilson AJ, et al.: Airway eosinophilia is associated with wheeze but is uncommon in children with persistent cough and frequent chest colds. Am J Respir Crit Care Med 2001 Sep 15;164:977–981.

16. Ponsonby A-L, Gatenby P, Glasgow N, Mullins R, McDonald T, Hurwitz M: Which clinical subgroups within the spectrum of child asthma are attributable to atopy? Chest 2002 Jan;121:135–142.

17. Kusel MMH, de Klerk NH, Kebadze T, Vohma V, Holt PG, Johnston SL, et al.: Early-life respiratory viral infections, atopic sensitization, and risk of subsequent development of persistent asthma. J Allergy Clin Immunol 2007 May;119:1105–1110.

18. Almqvist C, Li Q, Britton WJ, Kemp AS, Xuan W, Tovey ER, et al.: Early predictors for developing allergic disease and asthma: examining separate steps in the “allergic march.” Clin Exp Allergy 2007 Sep;37:1296–1302.

19. Lowe AJ, Hosking CS, Bennett CM, Carlin JB, Abramson MJ, Hill DJ, et al.: Skin prick test can identify eczematous infants at risk of asthma and allergic rhinitis. Clin Exp Allergy 2007 Nov;37:1624–1631.

20. Hollams EM, Deverell M, Serralha M, Suriyaarachchi D, Parsons F, Zhang G, et al.: Elucidation of asthma phenotypes in atopic teenagers through parallel immunophenotypic and clinical profiling. Journal of Allergy and Clinical Immunology 2009 Sep;124:463–470.e16.

21. Schultz A, Devadason S, Savenije O, Sly P, Le Souëf P, Brand P: The transient value of classifying preschool wheeze into episodic viral wheeze and multiple trigger wheeze. Acta Paediatrica 2009 Sep; DOI: 10.1111/j.1651-2227.2009.01508.x

22. Holt PG, Rowe J, Kusel M, Parsons F, Hollams EM, Bosco A, et al.: Toward improved prediction of risk for atopy and asthma among preschoolers: a prospective cohort study. J Allergy Clin Immunol 2010 Mar;125:653–659, 659.e1–659.e7.

23. Wang F, He XY, Baines KJ, Gunawardhana LP, Simpson JL, Li F, et al.: Different inflammatory phenotypes in adults and children with acute asthma. Eur Respir J 2011 Sep;38:567–574.

24. Govaere E, Van Gysel D, Verhamme KMC, Doli E, De Baets F: The association of allergic symptoms with sensitization to inhalant allergens in childhood. Pediatric Allergy and Immunology 2009 Aug;20:448–457.

25. Lopez N, de Barros-Mazon S, Vilela MM dos S, Condino Neto A, Ribeiro JD: Are immunoglobulin E levels associated with early wheezing? A prospective study in Brazilian infants. Eur Respir J 2002 Sep;20:640–645.

26. Solé D, Camelo-Nunes IC, Wandalsen GF, Melo KC, Naspitz CK: Is rhinitis alone or associated with atopic eczema a risk factor for severe asthma in children? Pediatr Allergy Immunol 2005 Mar;16:121–125.

27. Pereira MU, Sly PD, Pitrez PM, Jones MH, Escouto D, Dias ACO, et al.: Nonatopic asthma is associated with helminth infections and bronchiolitis in poor children. Eur Respir J 2007 Jun;29:1154–1160.

28. Baehler P, Chad Z, Gurbindo C, Bonin AP, Bouthillier L, Seidman EG: Distinct patterns of cow’s milk allergy in infancy defined by prolonged, two-stage double-blind, placebo-controlled food challenges. Clin Exp Allergy 1996 Mar;26:254–261.

29. Lawson JA, Rennie DC, Senthilselvan A, McDuffie HH, Cockcroft DW: Occurrence of new-onset wheeze in a 3-year follow-up study of schoolchildren. Annals of Allergy, Asthma & Immunology 2007 Dec;99:502–508.

30. Castro-Rodriguez JA, Ramirez AM, Toche P, Pavon D, Perez MA, Girardi G, et al.: Clinical, functional, and epidemiological differences between atopic and nonatopic asthmatic children from a tertiary care hospital in a developing country. Ann Allergy Asthma Immunol 2007 Mar;98:239–244.

31. Hon K-LE, Leung T, Ching G, Chow C, Luk V, Ko WF, et al.: Patterns of food and aeroallergen sensitization in childhood eczema. Acta Paediatrica 2008 Dec;97:1734–1737.

32. Celedón JC, Soto-Quiros ME, Hanson LA, Weiss ST: The relationship among markers of allergy, asthma, allergic rhinitis, and eczema in Costa Rica. Pediatr Allergy Immunol 2002 Apr;13:91–97.

33. Bunyavanich S, Soto-Quiros ME, Avila L, Laskey D, Senter JM, CeledÃ3n JC: Risk factors for allergic rhinitis in Costa Rican children with asthma. Allergy 2010 Feb;65:256–263.

34. Braae Olesen A, Bang K, Juul S, Thestrup-Pedersen K: Development and validation of a questionnaire for diagnosing atopic dermatitis. Acta Derm Venereol 2001 Sep;81:277–281.

35. Jøhnke H, Vach W, Norberg LA, Bindslev-Jensen C, Høst A, Andersen KE: A comparison between criteria for diagnosing atopic eczema in infants. Br J Dermatol 2005 Aug;153:352–358.

36. Bisgaard H, Hermansen MN, Loland L, Halkjaer LB, Buchvald F: Intermittent inhaled corticosteroids in infants with episodic wheezing. N Engl J Med 2006 May 11;354:1998–2005.

37. Halkjaer LB, Loland L, Buchvald FF, Agner T, Skov L, Strand M, et al.: Development of atopic dermatitis during the first 3 years of life: the Copenhagen prospective study on asthma in childhood cohort study in high-risk children. Arch Dermatol 2006 May;142:561–566.

38. Jøhnke H, Norberg LA, Vach W, Høst A, Andersen KE: Patterns of sensitization in infants and its relation to atopic dermatitis. Pediatr Allergy Immunol 2006 Dec;17:591–600.

39. Eller E, Kjaer HF, Høst A, Andersen KE, Bindslev-Jensen C: Food allergy and food sensitization in early childhood: results from the DARC cohort. Allergy 2009 Jul;64:1023–1029.

40. Chawes BLK, Kreiner-Møller E, Bisgaard H: Objective assessments of allergic and nonallergic rhinitis in young children. Allergy 2009 Oct;64:1547–1553.

41. Kjaer HF, Eller E, Andersen KE, Høst A, Bindslev-Jensen C: The association between early sensitization patterns and subsequent allergic disease. The DARC birth cohort study. Pediatr Allergy Immunol 2009 Dec;20:726–734.

42. Chawes BLK, Bønnelykke K, Kreiner-Møller E, Bisgaard H: Children with allergic and nonallergic rhinitis have a similar risk of asthma. J Allergy Clin Immunol 2010 Sep;126:567–573.e1–8.

43. Hyvärinen M, Piippo-Savolainen E, Korhonen K, Korppi M: Teenage asthma after severe infantile bronchiolitis or pneumonia. Acta Paediatr 2005 Oct;94:1378–1383.

44. Luoma R, Koivikko A, Viander M: Development of asthma, allergic rhinitis and atopic dermatitis by the age of five years. A prospective study of 543 newborns. Allergy 1983 Jul;38:339–346.

45. Kekki OM, Turjanmaa K, Isolauri E: Differences in skin-prick and patch-test reactivity are related to the heterogeneity of atopic eczema in infants. Allergy 1997 Jul;52:755–759.

46. Tikkanen S, Kokkonen J, Juntti H, Niinimäki A: Status of children with cow’s milk allergy in infancy by 10 years of age. Acta Paediatr 2000 Oct;89:1174–1180.

47. Reijonen TM, Kotaniemi-Syrjänen A, Korhonen K, Korppi M: Predictors of asthma three years after hospital admission for wheezing in infancy. Pediatrics 2000 Dec;106:1406–1412.

48. Kotaniemi-Syrjänen A, Reijonen TM, Korhonen K, Korppi M: Wheezing requiring hospitalization in early childhood: predictive factors for asthma in a six-year follow-up. Pediatr Allergy Immunol 2002 Dec;13:418–425.

49. Hyvärinen MK, Kotaniemi-Syrjänen A, Reijonen TM, Korhonen K, Korppi MO: Teenage asthma after severe early childhood wheezing: an 11-year prospective follow-up. Pediatr Pulmonol 2005 Oct;40:316–323.

50. Saarinen KM, Pelkonen AS, Mäkelä MJ, Savilahti E: Clinical course and prognosis of cow’s milk allergy are dependent on milk-specific IgE status. J Allergy Clin Immunol 2005 Oct;116:869–875.

51. Jartti T, Lehtinen P, Vuorinen T, Ruuskanen O: Bronchiolitis. The Pediatric Infectious Disease Journal 2009 Apr;28:311–317.

52. Delacourt C, Labbé D, Vassault A, Brunet-Langot D, de Blic J, Scheinmann P: Sensitization to inhalant allergens in wheezing infants is predictive of the development of infantile asthma. Allergy 1994 Dec;49:843–847.

53. Mortureux P, Léauté-Labrèze C, Legrain-Lifermann V, Lamireau T, Sarlangue J, Taïeb A: Acute urticaria in infancy and early childhood: a prospective study. Arch Dermatol 1998 Mar;134:319–323.

54. Tridon A, Fauquert JL, Dibet P, Betail G, Labbe A: Atopy parameters in asthmatic infants. J Investig Allergol Clin Immunol 1999 Aug;9:222–228.

55. Pénard-Morand C, Raherison C, Kopferschmitt C, Caillaud D, Lavaud F, Charpin D, et al.: Prevalence of food allergy and its relationship to asthma and allergic rhinitis in schoolchildren. Allergy 2005 Sep;60:1165–1171.

56. Herr M, Clarisse B, Nikasinovic L, Foucault C, Le Marec A-M, Giordanella J-P, et al.: Does allergic rhinitis exist in infancy? Findings from the PARIS birth cohort. Allergy 2011 Feb;66:214–221.

57. Bergmann RL, Edenharter G, Bergmann KE, Forster J, Bauer CP, Wahn V, et al.: Atopic dermatitis in early infancy predicts allergic airway disease at 5 years. Clin Exp Allergy 1998 Aug;28:965–970.

58. Schäfer T, Heinrich J, Wjst M, Adam H, Ring J, Wichmann HE: Association between severity of atopic eczema and degree of sensitization to aeroallergens in schoolchildren. J Allergy Clin Immunol 1999 Dec;104:1280–1284.

59. Kulig M, Klettke U, Wahn V, Forster J, Bauer CP, Wahn U: Development of seasonal allergic rhinitis during the first 7 years of life. J Allergy Clin Immunol 2000 Nov;106:832–839.

60. Illi S, von Mutius E, Lau S, Nickel R, Niggemann B, Sommerfeld C, et al.: The pattern of atopic sensitization is associated with the development of asthma in childhood. J Allergy Clin Immunol 2001 Nov;108:709–714.

61. Riedinger F, Kuehr J, Strauch E, Schulz H, Ihorst G, Forster J: Natural history of hay fever and pollen sensitization, and doctors’ diagnosis of hay fever and pollen asthma in German schoolchildren. Allergy 2002 Jun;57:488–492.

62. Lau S, Illi S, Sommerfeld C, Niggemann B, Völkel K, Madloch C, et al.: Transient early wheeze is not associated with impaired lung function in 7-yr-old children. Eur Respir J 2003 May;21:834–841.

63. Fritz GJ, Herbarth O: Asthmatic disease among urban preschoolers: an observational study. Int J Hyg Environ Health 2004 Jan;207:23–30.

64. Laske N, Niggemann B: Does the severity of atopic dermatitis correlate with serum IgE levels? Pediatr Allergy Immunol 2004 Feb;15:86–88.

65. Illi S, von Mutius E, Lau S, Nickel R, Grüber C, Niggemann B, et al.: The natural course of atopic dermatitis from birth to age 7 years and the association with asthma. J Allergy Clin Immunol 2004 May;113:925–931.

66. Niggemann B, Celik-Bilgili S, Ziegert M, Reibel S, Sommerfeld C, Wahn U: Specific IgE levels do not indicate persistence or transience of food allergy in children with atopic dermatitis. J Investig Allergol Clin Immunol 2004;14:98–103.

67. Illi S, von Mutius E, Lau S, Niggemann B, Grüber C, Wahn U: Perennial allergen sensitisation early in life and chronic asthma in children: a birth cohort study. Lancet 2006 Aug 26;368:763–770.

68. Brockow I, Zutavern A, Hoffmann U, Grübl A, von Berg A, Koletzko S, et al.: Early allergic sensitizations and their relevance to atopic diseases in children aged 6 years: results of the GINI study. J Investig Allergol Clin Immunol 2009;19:180–187.

69. Schnabel E, Sausenthaler S, Schaaf B, Schäfer T, Lehmann I, Behrendt H, et al.: Prospective association between food sensitization and food allergy: results of the LISA birth cohort study. Clinical & Experimental Allergy 2010 Mar;40:450–457.

70. Peters AS, Kellberger J, Vogelberg C, Dressel H, Windstetter D, Weinmayr G, et al.: Prediction of the incidence, recurrence, and persistence of atopic dermatitis in adolescence: a prospective cohort study. J Allergy Clin Immunol 2010 Sep;126:590–595.e1–3.

71. Rochat MK, Illi S, Ege MJ, Lau S, Keil T, Wahn U, et al.: Allergic rhinitis as a predictor for wheezing onset in school-aged children. J Allergy Clin Immunol 2010 Dec;126:1170–1175.e2.

72. Priftis KN, Mermiri D, Papadopoulou A, Papadopoulos M, Fretzayas A, Lagona E: Asthma Symptoms and Bronchial Reactivity in School Children Sensitized to Food Allergens in Infancy. Journal of Asthma 2008 Jan;45:590–595.

73. Hidvegi E, Cserhati E, Kereki E, Savilahti E, Arato A: Serum immunoglobulin E, IgA, and IgG antibodies to different cow’s milk proteins in children with cow’s milk allergy: association with prognosis and clinical manifestations. Pediatr Allergy Immunol 2002 Aug;13:255–261.

74. Pourpak Z, Ghojezadeh L, Mansouri M, Mozaffari H, Farhoudi A: Wheat anaphylaxis in children. Immunol Invest 2007;36:175–182.

75. Geller-Bernstein G, Kenett R, Weisglass L, Tsur S, Lahav M, Levin S: Atopic babies with wheezy bronchitis. Follow-up study relating prognosis to sequential IgE values, type of early infant feeding, exposure to parental smoking and incidence of lower respiratory tract infections. Allergy 1987 Feb;42:85–91.

76. Roizin H, Reshef A, Katz I, Benzaray S, Lison M, Shiner RJ: Atopy, bronchial hyperresponsiveness, and peak flow variability in children with mild occasional wheezing. Thorax 1996 Mar;51:272–276.

77. Novembre E, Cianferoni A, Bernardini R, Mugnaini L, Caffarelli C, Cavagni G, et al.: Anaphylaxis in children: clinical and allergologic features. Pediatrics 1998 Apr;101:E8.

78. Patrizi A, Guerrini V, Ricci G, Neri I, Specchia F, Masi M: The natural history of sensitizations to food and aeroallergens in atopic dermatitis: a 4-year follow-Up. Pediatr Dermatol 2000 Aug;17:261–265.

79. Pajno GB, Peroni DG, Barberio G, Pietrobelli A, Boner AL: Predictive features for persistence of atopic dermatitis in children. Pediatr Allergy Immunol 2003 Aug;14:292–295.

80. Peroni DG, Piacentini GL, Alfonsi L, Zerman L, Di Blasi P, Visona’ G, et al.: Rhinitis in pre-school children: prevalence, association with allergic diseases and risk factors. Clin Exp Allergy 2003 Oct;33:1349–1354.

81. Fasce L, Tosca MA, Olcese R, Milanese M, Erba D, Ciprandi G: The natural history of allergy: the development of new sensitizations in asthmatic children. Immunol Lett 2004 Apr 30;93:45–50.

82. Fiocchi A, Besana R, Rydén A-C, Terracciano L, Andreotti M, Arrigoni S, et al.: Differential diagnosis of IgE-mediated allergy in young children with wheezing or eczema symptoms using a single blood test. Ann Allergy Asthma Immunol 2004 Oct;93:328–333.

83. Cantani A, Micera M: Natural history of cow’s milk allergy. An eight-year follow-up study in 115 atopic children. Eur Rev Med Pharmacol Sci 2004 Aug;8:153–164.

84. Cardinale F, de Benedictis FM, Muggeo V, Giordano P, Loffredo MS, Iacoviello G, et al.: Exhaled nitric oxide, total serum IgE and allergic sensitization in childhood asthma and allergic rhinitis. Pediatr Allergy Immunol 2005 May;16:236–242.

85. De Sario M, Di Domenicantonio R, Corbo G, Forastiere F, Pistelli R, Rusconi F, et al.: Characteristics of early transient, persistent, and late onset wheezers at 9 to 11 years of age. J Asthma 2006 Oct;43:633–638.

86. Barberio G, Pajno GB, Vita D, Caminiti L, Canonica GW, Passalacqua G: Does a “reverse” atopic march exist? Allergy 2008 Dec;63:1630–1632.

87. Jesenak M, Rennerova Z, Babusikova E, Havlicekova Z, Jakusova L, Villa MP, et al.: Food allergens and respiratory symptoms. J Physiol Pharmacol 2008 Dec;59 Suppl 6:311–320.

88. Ciprandi G, Capasso M: Association of childhood perennial allergic rhinitis with subclinical airflow limitation. Clin Exp Allergy 2010 Mar;40:398–402.

89. Cibella F, Cuttitta G, La Grutta S, Melis MR, Lospalluti ML, Uasuf CG, et al.: Proportional Venn diagram and determinants of allergic respiratory diseases in Italian adolescents. Pediatric Allergy and Immunology 2011 Feb;22:60–68.

90. Toyoshima K, Hayashida M, Yasunami J, Takamatsu I, Niwa H, Muraoka T: Factors influencing the prognosis of wheezy infants. J Asthma 1987;24:267–270.

91. Rokaite R, Labanauskas L: Gastrointestinal disorders in children with atopic dermatitis. Medicina (Kaunas) 2005;41:837–845.

92. Crane J, O’Donnell TV, Prior IA, Waite DA: The relationships between atopy, bronchial hyperresponsiveness, and a family history of asthma: a cross-sectional study of migrant Tokelauan children in New Zealand. J Allergy Clin Immunol 1989 Nov;84:768–772.

93. Nystad W, Skrondal A, Njå F, Hetlevik O, Carlsen KH, Magnus P: Recurrent respiratory tract infections during the first 3 years of life and atopy at school age. Allergy 1998 Dec;53:1189–1194.

94. Lodrup Carlsen KC, Carlsen KH, Nafstad P, Bakketeig L: Perinatal risk factors for recurrent wheeze in early life. Pediatr Allergy Immunol 1999 May;10:89–95.

95. Smidesang I, Saunes M, Storrø O, Øien T, Holmen TL, Johnsen R, et al.: Allergy related disorders among 2-yrs olds in a general population. The PACT Study. Pediatric Allergy and Immunology 2010 Mar;21:315–320.

96. Bertelsen RJ, Carlsen KCL, Carlsen K-H: Rhinitis in children: co-morbidities and phenotypes. Pediatr Allergy Immunol 2010 Jun;21:612–622.

97. Lang A, Mowinckel P, Sachs-Olsen C, Riiser A, Lunde J, Carlsen K-H, et al.: Asthma severity in childhood, untangling clinical phenotypes*. Pediatric Allergy and Immunology 2010 Sep;21:945–953.

98. Jedrychowski W, Perera FP, Maugeri U, Mrozek-Budzyn D, Mroz E, Flak E, et al.: Early wheezing phenotypes and severity of respiratory illness in very early childhoodStudy on intrauterine exposure to fine particle matter. Environment International 2009 Aug;35:877–884.

99. Czarnobilska E, Obtulowicz K, Dyga W, Spiewak R: A half of schoolchildren with “ISAAC eczema” are ill with allergic contact dermatitis. J Eur Acad Dermatol Venereol 2011 Sep;25:1104–1107.

100. Kidon MI, Chiang WC, Chin CW, Liew WK, Kang LW, Ong TC, et al.: Mite component-specific IgE repertoire and phenotypes of allergic disease in childhood: the tropical perspective. Pediatr Allergy Immunol 2011 Mar;22:202–210.

101. Chiang WC, Chen YM, Tan HKK, Balakrishnan A, Liew WK, Lim HH, et al.: Allergic rhinitis and non-allergic rhinitis in children in the tropics: prevalence and risk associations. Pediatr Pulmonol 2012 Oct;47:1026–1033.

102. Mercer MJ, van der Linde GP, Joubert G: Rhinitis (allergic and nonallergic) in an atopic pediatric referral population in the grasslands of inland South Africa. Ann Allergy Asthma Immunol 2002 Nov;89:503–512.

103. Lee YJ, Kim KW, Choi BS, Sohn MH, Kim K-E: Clinical characteristics of eosinophilic and noneosinophilic asthma in children. Acta Paediatr 2013 Jan;102:53–57.

104. Oh M-A, Shim JY, Jung Y-H, Seo J-H, Young Kim H, Kwon J-W, et al.: Fraction of exhaled nitric oxide and wheezing phenotypes in preschool children. Pediatr Pulmonol 2013 Jun;48:563–570.

105. Villa JR, García G, Rueda S, Nogales A: Serum eosinophilic cationic protein may predict clinical course of wheezing in young children. Arch Dis Child 1998 May;78:448–452.

106. Martín-Muñoz MF, Pagliara L, Antelo MC, Madero Jarabo R, Barrio MI, Martinez MC, et al.: Exercise-induced asthma in asthmatic children. Predisposing factors. Allergol Immunopathol (Madr) 2008 Jun;36:123–127.

107. Garcia-Marcos L, Rubi Ruiz T, Garcia-Hernandez G, Suarez-Varela MM, Valverde-Molina J, Sanchez-Solis M: Asthma and rhinoconjunctivitis comorbidity: United airway disease or inherited target organs? Pediatric Allergy and Immunology 2010 Feb;21:e142–e148.

108. Foucard T, Sjöberg O: A prospective 12-year follow-up study of children with wheezy bronchitis. Acta Paediatr Scand 1984 Sep;73:577–583.

109. Rylander E, Eriksson M, Freyschuss U: Risk factors for occasional and recurrent wheezing after RSV infection in infancy. Acta Paediatr Scand 1988 Sep;77:711–715.

110. Croner S, Kjellman NI: Natural history of bronchial asthma in childhood. A prospective study from birth up to 12-14 years of age. Allergy 1992 Apr;47:150–157.

111. Hattevig G, Kjellman B, Björkstén B: Appearance of IgE antibodies to ingested and inhaled allergens during the first 12 years of life in atopic and non-atopic children. Pediatr Allergy Immunol 1993 Nov;4:182–186.

112. Wennergren G, Amark M, Amark K, Oskarsdóttir S, Sten G, Redfors S: Wheezing bronchitis reinvestigated at the age of 10 years. Acta Paediatr 1997 Apr;86:351–355.

113. Rönmark E, Jönsson E, Platts-Mills T, Lundbäck B: Different pattern of risk factors for atopic and nonatopic asthma among children--report from the Obstructive Lung Disease in Northern Sweden Study. Allergy 1999 Sep;54:926–935.

114. Gustafsson D, Sjöberg O, Foucard T: Development of allergies and asthma in infants and young children with atopic dermatitis--a prospective follow-up to 7 years of age. Allergy 2000 Mar;55:240–245.

115. Böhme M, Lannerö E, Wickman M, Nordvall SL, Wahlgren C-F: Atopic dermatitis and concomitant disease patterns in children up to two years of age. Acta Derm Venereol 2002;82:98–103.

116. Wickman M, Ahlstedt S, Lilja G, van Hage Hamsten M: Quantification of IgE antibodies simplifies the classification of allergic diseases in 4-year-old children. A report from the prospective birth cohort study--BAMSE. Pediatr Allergy Immunol 2003 Dec;14:441–447.

117. Gustafsson D, Sjöberg O, Foucard T: Sensitization to food and airborne allergens in children with atopic dermatitis followed up to 7 years of age. Pediatr Allergy Immunol 2003 Dec;14:448–452.

118. Sandin A, Björkstén B, Bråbäck L: Development of atopy and wheezing symptoms in relation to heredity and early pet keeping in a Swedish birth cohort. Pediatr Allergy Immunol 2004 Aug;15:316–322.

119. Ostblom E, Wickman M, van Hage M, Lilja G: Reported symptoms of food hypersensitivity and sensitization to common foods in 4-year-old children. Acta Paediatr 2008 Jan;97:85–90.

120. Ostblom E, Lilja G, Pershagen G, van Hage M, Wickman M: Phenotypes of food hypersensitivity and development of allergic diseases during the first 8 years of life. Clin Exp Allergy 2008 Aug;38:1325–1332.

121. Asarnoj A, Movérare R, Ostblom E, Poorafshar M, Lilja G, Hedlin G, et al.: IgE to peanut allergen components: relation to peanut symptoms and pollen sensitization in 8-year-olds. Allergy 2010 Sep;65:1189–1195.

122. Westman M, Stjärne P, Asarnoj A, Kull I, van Hage M, Wickman M, et al.: Natural course and comorbidities of allergic and nonallergic rhinitis in children. J Allergy Clin Immunol 2012 Feb;129:403–408.

123. Chang K-L, Yang Y-H, Yu H-H, Lee J-H, Wang L-C, Chiang B-L: Analysis of serum total IgE, specific IgE and eosinophils in children with acute and chronic urticaria. J Microbiol Immunol Infect 2013 Feb;46:53–58.

124. Shen C-Y, Lin M-C, Lin H-K, Lin C-H, Fu L-S, Fu Y-C: The natural course of eczema from birth to age 7 years and the association with asthma and allergic rhinitis: a population-based birth cohort study. Allergy Asthma Proc 2013 Feb;34:78–83.

125. Sangsupawanich P, Chongsuvivatwong V, Mo-Suwan L, Choprapawon C: Relationship between atopic dermatitis and wheeze in the first year of life: analysis of a prospective cohort of Thai children. J Investig Allergol Clin Immunol 2007;17:292–296.

126. Montefort S, Muscat HA, Caruana S, Lenicker H: Allergic conditions in 5-8-year-old Maltese schoolchildren: prevalence, severity, and associated risk factors [ISAAC]. Pediatr Allergy Immunol 2002 Apr;13:98–104.

127. Duiverman EJ, Neijens HJ, van Strik R, Affourtit MJ, Kerrebijn KF: Lung function and bronchial responsiveness in children who had infantile bronchiolitis. Pediatr Pulmonol 1987 Feb;3:38–44.

128. Laan MP, Baert MR, Bijl AM, Vredendaal AE, De Waard-van der Spek FB, Oranje AP, et al.: Markers for early sensitization and inflammation in relation to clinical manifestations of atopic disease up to 2 years of age in 133 high-risk children. Clin Exp Allergy 2000 Jul;30:944–953.

129. Brussee JE, Smit HA, Koopman LP, Wijga AH, Kerkhof M, Corver K, et al.: Interrupter resistance and wheezing phenotypes at 4 years of age. Am J Respir Crit Care Med 2004 Jan 15;169:209–213.

130. Schönberger H, van Schayck O, Muris J, Bor H, van den Hoogen H, Knottnerus A, et al.: Towards improving the accuracy of diagnosing asthma in early childhood. Eur J Gen Pract 2004 Dec;10:138–145, 151.

131. Brussee JE, Smit HA, Kerkhof M, Koopman LP, Wijga AH, Postma DS, et al.: Exhaled nitric oxide in 4-year-old children: relationship with asthma and atopy. Eur Respir J 2005 Mar;25:455–461.

132. Jacobs K, Brand P: Can sensitization to aeroallergens disappear over time in children with allergic disease? Acta Paediatrica 2010 Sep;99:1361–1364.

133. Gürkan F, Davutog Lu M, Bilici M, Sincar N, Haspolat K: Pulmonary functions in atopic and nonatopic asthmatic children. Allergol Immunopathol (Madr) 2002 Apr;30:70–73.

134. Saraçlar Y, Kuyucu S, Tuncer A, Sekerel B, Saçkesen C, Kocabaş C: Prevalence of asthmatic phenotypes and bronchial hyperresponsiveness in Turkish schoolchildren: an International Study of Asthma and Allergies in Childhood (ISAAC) phase 2 study. Ann Allergy Asthma Immunol 2003 Nov;91:477–484.

135. Sackesen C, Sekerel BE, Orhan F, Kocabas CN, Tuncer A, Adalioglu G: The etiology of different forms of urticaria in childhood. Pediatr Dermatol 2004 Apr;21:102–108.

136. Kuyucu S, Saraçlar Y, Tuncer A, Geyik PO, Adalioğlu G, Akpinarli A, et al.: Epidemiologic characteristics of rhinitis in Turkish children: the International Study of Asthma and Allergies in Childhood (ISAAC) phase 2. Pediatr Allergy Immunol 2006 Jun;17:269–277.

137. Baris S, Karakoc-Aydiner E, Ozen A, Ozdemir C, Bahceciler NN, Barlan IB: Serum immunoglobulin levels as a predictive factor for a better outcome of non-atopic childhood asthma. Pediatric Allergy and Immunology 2011 May;22:298–304.

138. Civelek E, Cakir B, Orhan F, Yuksel H, Boz AB, Uner A, et al.: Risk factors for current wheezing and its phenotypes among elementary school children. Pediatr Pulmonol 2011 Feb;46:166–174.

139. Yavuz ST, Sahiner UM, Buyuktiryaki B, Soyer OU, Tuncer A, Sekerel BE, et al.: Phenotypes of IgE-mediated food allergy in Turkish children. Allergy Asthma Proc 2011 Dec;32:47–55.

140. Keleş E, Yazgan H, Gebeşçe A: To Evaluate Serum Eosinophil Cationic Protein and Total IgE Concomitantly May Predict the Persistence of Wheezing in Young Children. ISRN Pediatr 2012;2012:168379.

141. Price JF, Cogswell JJ, Joseph MC, Cochrane GM: Exercise-induced bronchocontriction, skin sensitivity, and serum IgE in children with eczema. Arch Dis Child 1976 Dec;51:912–917.

142. Blair H: Natural history of childhood asthma. 20-year follow-up. Arch Dis Child 1977 Aug;52:613–619.

143. Gordon RR, Noble DA, Ward AM, Allen R: Immunoglobulin E and the eczema-asthma syndrome in early childhood. Lancet 1982 Jan 9;1:72–74.

144. Lee DA, Winslow NR, Speight AN, Hey EN: Prevalence and spectrum of asthma in childhood. Br Med J (Clin Res Ed) 1983 Apr 16;286:1256–1258.

145. Park ES, Golding J, Carswell F, Stewart-Brown S: Preschool wheezing and prognosis at 10. Arch Dis Child 1986 Jul;61:642–646.

146. Clifford RD, Howell JB, Radford M, Holgate ST: Associations between respiratory symptoms, bronchial response to methacholine, and atopy in two age groups of schoolchildren. Arch Dis Child 1989 Aug;64:1133–1139.

147. Sporik R, Holgate ST, Cogswell JJ: Natural history of asthma in childhood--a birth cohort study. Arch Dis Child 1991 Sep;66:1050–1053.

148. Salob SP, Laverty A, Atherton DJ: Bronchial hyperresponsiveness in children with atopic dermatitis. Pediatrics 1993 Jan;91:13–16.

149. Wilson NM, Bridge P, Silverman M: Bronchial responsiveness and symptoms in 5-6 year old children: a comparison of a direct and indirect challenge. Thorax 1995 Apr;50:339–345.

150. Brooke AM, Lambert PC, Burton PR, Clarke C, Luyt DK, Simpson H: The natural history of respiratory symptoms in preschool children. Am J Respir Crit Care Med 1995 Dec;152:1872–1878.

151. Christie GL, Helms PJ, Ross SJ, Godden DJ, Friend JA, Legge JS, et al.: Outcome of children of parents with atopic asthma and transient childhood wheezy bronchitis. Thorax 1997 Nov;52:953–957.

152. Withers NJ, Low L, Holgate ST, Clough JB: The natural history of respiratory symptoms in a cohort of adolescents. Am J Respir Crit Care Med 1998 Aug;158:352–357.

153. Christie GL, Helms PJ, Godden DJ, Ross SJ, Friend JA, Legge JS, et al.: Asthma, wheezy bronchitis, and atopy across two generations. Am J Respir Crit Care Med 1999 Jan;159:125–129.

154. Clough JB, Keeping KA, Edwards LC, Freeman WM, Warner JA, Warner JO: Can we predict which wheezy infants will continue to wheeze? Am J Respir Crit Care Med 1999 Nov;160:1473–1480.

155. McKenzie SA, Bridge PD, Healy MJ: Airway resistance and atopy in preschool children with wheeze and cough. Eur Respir J 2000 May;15:833–838.

156. Arshad SH, Tariq SM, Matthews S, Hakim E: Sensitization to common allergens and its association with allergic disorders at age 4 years: a whole population birth cohort study. Pediatrics 2001 Aug;108:E33.

157. Sherriff A, Peters TJ, Henderson J, Strachan D: Risk factor associations with wheezing patterns in children followed longitudinally from birth to 3(1/2) years. Int J Epidemiol 2001 Dec;30:1473–1484.

158. Arshad SH, Kurukulaaratchy RJ, Fenn M, Waterhouse L, Matthews S: Rhinitis in 10-year-old children and early life risk factors for its development. Acta Paediatr 2002;91:1334–1338.

159. Kurukulaaratchy RJ, Fenn MH, Waterhouse LM, Matthews SM, Holgate ST, Arshad SH: Characterization of wheezing phenotypes in the first 10 years of life. Clin Exp Allergy 2003 May;33:573–578.

160. Kurukulaaratchy R, Fenn M, Matthews S, Hasan Arshad S: The prevalence, characteristics of and early life risk factors for eczema in 10-year-old children. Pediatr Allergy Immunol 2003 Jun;14:178–183.

161. Kurukulaaratchy RJ, Matthews S, Holgate ST, Arshad SH: Predicting persistent disease among children who wheeze during early life. Eur Respir J 2003 Nov;22:767–771.

162. Kurukulaaratchy RJ, Matthews S, Arshad SH: Does environment mediate earlier onset of the persistent childhood asthma phenotype? Pediatrics 2004 Feb;113:345–350.

163. Ben-Gashir MA, Seed PT, Hay RJ: Predictors of atopic dermatitis severity over time. J Am Acad Dermatol 2004 Mar;50:349–356.

164. Perkin MR, Strachan DP, Williams HC, Kennedy CTC, Golding J: Natural history of atopic dermatitis and its relationship to serum total immunoglobulin E in a population-based birth cohort study. Pediatr Allergy Immunol 2004 Jun;15:221–229.

165. Kurukulaaratchy RJ, Fenn M, Matthews S, Arshad SH: Characterisation of atopic and non-atopic wheeze in 10 year old children. Thorax 2004 Jul;59:563–568.

166. Lowe LA, Simpson A, Woodcock A, Morris J, Murray CS, Custovic A: Wheeze phenotypes and lung function in preschool children. Am J Respir Crit Care Med 2005 Feb 1;171:231–237.

167. Kurukulaaratchy RJ, Matthews S, Arshad SH: Defining childhood atopic phenotypes to investigate the association of atopic sensitization with allergic disease. Allergy 2005 Oct;60:1280–1286.

168. Kurukulaaratchy RJ, Waterhouse L, Matthews SM, Arshad SH: Are influences during pregnancy associated with wheezing phenotypes during the first decade of life? Acta Paediatr 2005 May;94:553–558.

169. Wassall HJ, Devenny AM, Daud Khan S, Ninan TK, Russell G: A comparison of virus-associated and multi-trigger wheeze in school children. J Asthma 2005 Nov;42:737–744.

170. Carroll WD, Lenney W, Child F, Strange RC, Jones PW, Whyte MK, et al.: Asthma severity and atopy: how clear is the relationship? Arch Dis Child 2006 May;91:405–409.

171. Kurukulaaratchy RJ, Matthews S, Arshad SH: Relationship between childhood atopy and wheeze: what mediates wheezing in atopic phenotypes? Ann Allergy Asthma Immunol 2006 Jul;97:84–91.

172. Marinho S, Simpson A, Lowe L, Kissen P, Murray C, Custovic A: Rhinoconjunctivitis in 5-year-old children: a population-based birth cohort study. Allergy 2007 Apr;62:385–393.

173. Elphick HE, Ritson S, Rigby AS, Everard ML: Phenotype of acute respiratory syncytial virus induced lower respiratory tract illness in infancy and subsequent morbidity. Acta Paediatr 2007 Feb;96:307–309.

174. Sonnappa S, Bastardo CM, Wade A, Saglani S, McKenzie SA, Bush A, et al.: Symptom-pattern phenotype and pulmonary function in preschool wheezers. J Allergy Clin Immunol 2010 Sep;126:519–526.e1–7.

175. Fleming L, Tsartsali L, Wilson N, Regamey N, Bush A: Sputum inflammatory phenotypes are not stable in children with asthma. Thorax 2012 Aug;67:675–681.

176. Halonen M, Stern D, Taussig LM, Wright A, Ray CG, Martinez FD: The predictive relationship between serum IgE levels at birth and subsequent incidences of lower respiratory illnesses and eczema in infants. Am Rev Respir Dis 1992 Oct;146:866–870.

177. Martinez FD, Wright AL, Taussig LM, Holberg CJ, Halonen M, Morgan WJ: Asthma and wheezing in the first six years of life. The Group Health Medical Associates. N Engl J Med 1995 Jan 19;332:133–138.

178. Stein RT, Holberg CJ, Morgan WJ, Wright AL, Lombardi E, Taussig L, et al.: Peak flow variability, methacholine responsiveness and atopy as markers for detecting different wheezing phenotypes in childhood. Thorax 1997 Nov;52:946–952.

179. Chan MT, Leung DY, Szefler SJ, Spahn JD: Difficult-to-control asthma: clinical characteristics of steroid-insensitive asthma. J Allergy Clin Immunol 1998 May;101:594–601.

180. Martinez FD, Stern DA, Wright AL, Taussig LM, Halonen M: Differential immune responses to acute lower respiratory illness in early life and subsequent development of persistent wheezing and asthma. J Allergy Clin Immunol 1998 Dec;102:915–920.

181. Sherrill DL, Stein R, Halonen M, Holberg CJ, Wright A, Martinez FD: Total serum IgE and its association with asthma symptoms and allergic sensitization among children. J Allergy Clin Immunol 1999 Jul;104:28–36.

182. Halonen M, Stern DA, Lohman C, Wright AL, Brown MA, Martinez FD: Two subphenotypes of childhood asthma that differ in maternal and paternal influences on asthma risk. Am J Respir Crit Care Med 1999 Aug;160:564–570.

183. Bansal A, Farnham JM, Crapo RO, Hughes DC, Jensen RL, Cannon-Albright LA: A simple diagnostic index for asthma. Clin Exp Allergy 2001 May;31:756–760.

184. Klinnert MD, Nelson HS, Price MR, Adinoff AD, Leung DY, Mrazek DA: Onset and persistence of childhood asthma: predictors from infancy. Pediatrics 2001 Oct;108:E69.

185. Kelley CF, Mannino DM, Homa DM, Savage-Brown A, Holguin F: Asthma phenotypes, risk factors, and measures of severity in a national sample of US children. Pediatrics 2005 Mar;115:726–731.

186. Morgan WJ, Stern DA, Sherrill DL, Guerra S, Holberg CJ, Guilbert TW, et al.: Outcome of asthma and wheezing in the first 6 years of life: follow-up through adolescence. Am J Respir Crit Care Med 2005 Nov 15;172:1253–1258.

187. Borish L, Chipps B, Deniz Y, Gujrathi S, Zheng B, Dolan CM: Total serum IgE levels in a large cohort of patients with severe or difficult-to-treat asthma. Ann Allergy Asthma Immunol 2005 Sep;95:247–253.

188. Bacharier LB, Phillips BR, Bloomberg GR, Zeiger RS, Paul IM, Krawiec M, et al.: Severe intermittent wheezing in preschool children: a distinct phenotype. J Allergy Clin Immunol 2007 Mar;119:604–610.

189. Schroeder A, Kumar R, Pongracic JA, Sullivan CL, Caruso DM, Costello J, et al.: Food allergy is associated with an increased risk of asthma. Clinical & Experimental Allergy 2009 Feb;39:261–270.

190. Wegienka G, Havstad S, Zoratti EM, Ownby DR, Johnson CC: Association of early life wheeze and lung function. Annals of Allergy, Asthma & Immunology 2009 Jan;102:29–34.

191. Keet CA, Matsui EC, Dhillon G, Lenehan P, Paterakis M, Wood RA: The natural history of wheat allergy. Annals of Allergy, Asthma & Immunology 2009 May;102:410–415.

192. Wang J, Lin J, Bardina L, Goldis M, Nowak-Wegrzyn A, Shreffler WG, et al.: Correlation of IgE/IgG4 milk epitopes and affinity of milk-specific IgE antibodies with different phenotypes of clinical milk allergy. J Allergy Clin Immunol 2010 Mar;125:695–702, 702.e1–702.e6.

193. Fitzpatrick AM, Higgins M, Holguin F, Brown LAS, Teague WG: The molecular phenotype of severe asthma in children. J Allergy Clin Immunol 2010 Apr;125:851–857.e18.

194. Sala KA, Carroll CL, Tang Y-S, Aglio T, Dressler AM, Schramm CM: Factors associated with the development of severe asthma exacerbations in children. J Asthma 2011 Aug;48:558–564.

195. Wolkerstorfer A, Wahn U, Kjellman NIM, Diepgen TL, De Longueville M, Oranje AP: Natural course of sensitization to cow’s milk and hen’s egg in childhood atopic dermatitis: ETAC study group. Clin Exp Allergy 2002 Jan;32:70–73.

196. Karadag B, Ege MJ, Scheynius A, Waser M, Schram-Bijkerk D, van Hage M, et al.: Environmental determinants of atopic eczema phenotypes in relation to asthma and atopic sensitization. Allergy 2007 Dec;62:1387–1393.

197. Pillai SG, Tang Y, van den Oord E, Klotsman M, Barnes K, Carlsen K, et al.: Factor analysis in the Genetics of Asthma International Network family study identifies five major quantitative asthma phenotypes. Clinical & Experimental Allergy 2008 Mar;38:421–429.

198. Spycher BD, Silverman M, Kuehni CE: Phenotypes of childhood asthma: are they real? Clin Exp Allergy 2010 Aug;40:1130–1141.

199. Pekkanen J, Lampi J, Genuneit J, Hartikainen A-L, Järvelin M-R: Analyzing atopic and non-atopic asthma. Eur J Epidemiol 2012 Apr;27:281–286.

200. Wardlaw AJ, Brightling CE, Green R, Woltmann G, Bradding P, Pavord ID: New insights into the relationship between airway inflammation and asthma. Clin Sci 2002 Aug;103:201–211.

201. Bieber T: Atopic dermatitis 2.0: from the clinical phenotype to the molecular taxonomy and stratified medicine. Allergy 2012 Dec;67:1475–1482.
